# 1 Philympics 2021: Prophage 2 Predictions Perplex Programs

3 Michael J. Roach<sup>1\*</sup>, Katelyn McNair<sup>2</sup>, Sarah K. Giles<sup>1</sup>, Laura Inglis<sup>1</sup>, Evan Pargin<sup>1</sup>, Simon Roux<sup>3</sup>,  
4 Przemysław Decewicz<sup>4</sup>, Robert A. Edwards<sup>1</sup>

5 1. Flinders Accelerator for Microbiome Exploration, Flinders University, 5042, SA, Australia

6 2. Computational Sciences Research Center, San Diego State University, San Diego, 92182, CA, USA

7 3. DOE Joint Genome Institute, Walnut Creek, 94596, CA, USA

8 4. Department of Environmental Microbiology and Biotechnology, Institute of Microbiology, Faculty  
9 of Biology, University of Warsaw, Warsaw, 02-096, Poland

10

11 \*Corresponding Author: [michael.roach@flinders.edu.au](mailto:michael.roach@flinders.edu.au)

12

## 13 Abstract

14 Most bacterial genomes contain integrated bacteriophages—prophages—in various states of decay.  
15 Many are active and able to excise from the genome and replicate, while others are cryptic  
16 prophages, remnants of their former selves. Over the last two decades, many computational tools  
17 have been developed to identify the prophage components of bacterial genomes, and it is a  
18 particularly active area for the application of machine learning approaches. However, progress is  
19 hindered and comparisons thwarted because there are no manually curated bacterial genomes that  
20 can be used to test new prophage prediction algorithms.

21 Here, we present a library of gold-standard bacterial genome annotations that include manually  
22 curated prophage annotations, and a computational framework to compare the predictions from  
23 different algorithms. We use this suite to compare all extant stand-alone prophage prediction  
24 algorithms to identify their strengths and weaknesses.

25 We provide a FAIR dataset for prophage identification, and demonstrate the accuracy, precision,  
26 recall, and  $f_1$  score from the analysis of seven different algorithms for the prediction of prophages.  
27 We discuss caveats and concerns in this analysis and how those concerns may be mitigated.

28

## 29 Introduction

30 Bacteriophages (phages), viruses that infect bacteria, can be either temperate or virulent.  
31 Temperate phages may integrate into their bacterial host genome and the host-integrated phage  
32 genome is referred to as a prophage. Prophages are ubiquitous and may constitute as much as 20  
33 percent of bacterial genomes (Casjens, 2003). Prophages replicate as part of the host bacterial  
34 genomes until external conditions trigger a transition into the virulent lytic cycle, resulting in  
35 replication and packaging of phages and typically the death of the host bacteria. Prophages generally  
36 contain a set of core genes with a conserved gene order that facilitate integration into the host  
37 genome, assembly of phage structural components, replication, and lysis of the host cell (Kang et al.,  
38 2017, Canchaya et al., 2003). As well as these core genes, phages can contain an array of accessory  
39 metabolic genes that can effect significant phenotypic changes in the host bacteria (Breitbart, 2012).  
40 For instance, many prophages encode virulence factors such as toxins, or they can encode fitness  
41 factors such as nutrient uptake systems (Brüssow et al., 2004). Lastly, most prophages encode a  
42 variety of super-infection exclusion mechanism to prevent concurrent phage infections, including  
43 restriction/modification systems, toxin/antitoxin genes, repressors, etc. (Calendar, 1988). The  
44 function of most prophage accessory genes remains unknown.

45 Core (pro)phage genes have long been used for identifying prophage regions. However, there are  
46 other unique characteristics that can distinguish prophages from their host genomes: bacterial  
47 genomes have a GC skew that correlates with direction of replication, and the insertion of prophages  
48 will generally disrupt this GC bias (Grigoriev, 1998). Transcript direction (Campbell, 2002) and length  
49 of prophage proteins have also proven to be useful metrics in predicting prophages (Akhter et al.,  
50 2012, Song et al., 2019), where phage genes are generally smaller and are oriented in the same  
51 direction (Dutilh et al., 2014). Likewise, gene density tends to be higher in phage genomes and  
52 intergenic space shorter (Amgarten et al., 2018, McNair et al., 2019).

53 Over the last two decades many prophage prediction tools have been developed, and they fall into  
54 two broad classes: (1) web-based tools where users upload a bacterial genome and retrieve  
55 annotations including PHASTER (Arndt et al., 2016), Prophage Hunter (Song et al., 2019), Prophinder  
56 (Lima-Mendez et al., 2008), PhageWeb (Sousa et al., 2018), and RAST (Aziz et al., 2008); and (2)  
57 command-line tools where users download a program and database to run the predictions locally  
58 (although some of these also provide a web interface for remote execution). In this work we focus  
59 on this latter set of tools (Table 1) because web-based tools typically do not handle the large  
60 numbers of simultaneous requests required to run comparisons across many genomes.

61 Despite the abundance of prophage prediction algorithms, there has never been either a set of  
62 reference genomes against which all tools can be compared, nor a unified framework for comparing  
63 those tools to identify their relative strengths and weaknesses or to identify opportunities for  
64 improvement. We generated a set of manually annotated bacterial genomes released under the  
65 FAIR principles (Findable, Accessible, Interoperable, and Reusable), and developed an openly  
66 available and accessible framework to compare prophage prediction tools.

## 67 Methods

### 68 Running the tools

69 To assess the accuracy of the different prophage prediction tools, a set of 49 gold-standard publicly  
70 available bacterial genomes with manually curated prophage annotations was generated. The  
71 genomes and prophage annotations currently included are available in Tables S1 and S2. The  
72 genomes are in GenBank format and file conversion scripts are included in the framework to convert  
73 those files to formats used by the different software. The tools that are currently included in the  
74 framework are outlined in Table 1. Snakemake (Köster and Rahmann, 2012) pipelines utilising conda  
75 (Anaconda Software Distribution. *Conda*. v4.10.1, April 2021) package manager environments were  
76 created for each tool to handle the installation of the tool and its dependencies, running of the  
77 analyses, output file conversion to a standardized format, and benchmarking of the run stage.  
78 Where possible, annotations from the GenBank files were used in the analysis to promote  
79 consistency between comparisons. Additional pipelines were created for running PhiSpy using the  
80 included training sets for the appropriate genera, and for running PhiSpy with pVOG (Grazziotin et  
81 al., 2017) HMMs and these are also available in the repository. DBSCAN-SWA was not able to  
82 consistently finish when using GenBank files as input, and instead the genome files in fasta format  
83 were used. Another pipeline was created to pool the results from each tool and some comparisons  
84 are illustrated in the included Jupyter notebook. Testing and development of the pipelines were  
85 conducted on Flinders University's DeepThought HPC infrastructure. The final benchmarking analysis  
86 was performed on a stand-alone node consisting of dual Intel® Xeon® Gold 6242R processors  
87 (40 cores, 80 threads), 768 GB of RAM, and 58 TB of disk space. Each tool was executed on all  
88 genomes in parallel (one thread per job), with no other jobs running.

## 89 Benchmark metrics

90 There are many potential ways to compare prophage predictions: For instance, is it more important

### *Box 1. Benchmark Metrics Used in this Analysis*

Accuracy was calculated as the ratio of correctly labelled genes to all CDS features from the GenBank file.

$$\frac{TP + TN}{TP + TN + FP + FN}$$

Precision was calculated as the ratio of correctly labelled phage CDS features to all predicted prophage CDS features

$$\frac{TP}{TP + FP}$$

Recall was calculated as the ratio of correctly labelled prophage CDS features to all known prophage CDS features

$$\frac{TP}{TP + FN}$$

The f1 Score was calculated as the harmonic mean of Precision and Recall

$$2 \times \frac{(\text{Recall} \times \text{Precision})}{(\text{Recall} + \text{Precision})}$$

*Accuracy* provides an overall impression of correctness but is distorted by the vast difference in the numbers of prophage and non-prophage CDS features present in the genomes. The current gold-standard set includes 7,729 prophage proteins and 177,649 non-prophage proteins. Therefore, predicting everything as not coming from a prophage will result in an accuracy of 0.96. Similarly, identifying everything as coming from a prophage will result in high *Recall*, since that favours minimising false negatives. In contrast, *Precision* favours minimising false-positives and so only predicting very confident regions will result in high precision. The f1 Score is the most suitable for comparing predictions as it gives equal weighting to both precision and recall, and thus balances the unevenness inherent in this data.

91 to capture all prophage regions or minimise false positives? Is it more important to identify all the  
92 phage-encoded genes, or the exact locations of the attachment site core duplications (*attL* and  
93 *attR*)? The runtime and CPU time in seconds, peak memory usage and file write operations were

94 captured by Snakemake for the steps running the prophage tools only (not for any file conversion  
95 steps before or after running each tool). The predictions were then compared to the gold standard  
96 annotations and the number of true positive (TP), true negative (TN), false positive (FP) and false  
97 negative (FN) gene labels were used to calculate the performance metrics. Each application marks  
98 prophages slightly differently, and therefore we used the designation of coding sequence (CDS)  
99 features as phage or not to assess prophage predictions.

## 100 Adding new genomes

101 We developed the framework to simplify the addition of new genomes to the benchmarks. Each  
102 genome is provided in the standard GenBank format, and the prophages are marked by the inclusion  
103 of a non-standard flag for each genomic feature that indicates that it is part of a prophage. We use  
104 the qualifier */is\_phage="1"* to indicate prophage regions.

## 105 Results and Discussion

### 106 Software Compared

107 We compared the availability, installation, and results from ten different prophage prediction  
108 algorithms (Table 1). Two—ProphET (Reis-Cunha et al., 2019) and LysoPhD (Niu et al., 2019)—could  
109 not be successfully installed and were not included in the current framework (see below). The  
110 remaining eight PhiSpy (Akhter et al., 2012), Phage Finder (Fouts, 2006), VIBRANT (Kieft et al., 2020),  
111 VirSorter (Roux et al., 2015), Virsorter2 (Guo et al., 2021), Phigaro (Starikova et al., 2020),  
112 PhageBoost (Sirén et al., 2021), and DBSCAN-SWA (Gan et al., 2020) were each used to predict the  
113 prophages in 49 different manually curated microbial genomes.

114 Most of these programs utilize protein sequence similarity and HMM searches of core prophage  
115 genes to identify prophage regions. PhageBoost leverages a large range of protein features (such as  
116 dipeptide and tripeptide combinations) with a trained prediction model. PhiSpy was originally  
117 designed to identify prophage regions based upon seven distinct characteristics: protein length,  
118 transcript directionality, AT and GC skew, unique phage words, phage insertion points, optionally  
119 phage protein similarity and sequence similarity. DBSCAN-SWA likewise uses a range of gene metrics  
120 and trained prediction models to identify prophages.

121 Regardless of whether annotations are available, Virsorter2, Phigaro, and PhageBoost all perform *de*  
122 *novo* gene prediction with Prodigal (Hyatt et al., 2010) and VirSorter uses MetaGeneAnnotator  
123 (Noguchi et al., 2008) for the same purpose. VIBRANT can take proteins if they have ‘Prodigal format  
124 definition lines’ but otherwise performs predictions with Prodigal. PhageBoost can take existing  
125 annotations but this requires additional coding by the user. DBSCAN-SWA can take annotations or  
126 can perform gene predictions with Prokka (Seemann, 2014). PhiSpy takes an annotated genome in  
127 GenBank format and uses the annotations provided.

128

129 *Table 1: Prophage identification tools currently included in benchmarking framework*

| Tool (year)         | Version | Package manager | Dependencies                                                                                         | Database size                           | Approach                                                                                      | Citation                 |
|---------------------|---------|-----------------|------------------------------------------------------------------------------------------------------|-----------------------------------------|-----------------------------------------------------------------------------------------------|--------------------------|
| Phage Finder (2006) | 2.1     |                 | Aragorn, blast-legacy, hmmer, infernal, mummer, trnscan-se                                           | 93 MB                                   | Legacy-BLAST, HMMs                                                                            | (Fouts, 2006)            |
| PhiSpy (2012)       | 4.2.6   | conda, pip      | Python3, biopython, numpy, scipy                                                                     | 47 MB required, 733 MB optional (pVOGs) | Gene and nucleotide metrics, AT/CG skew, kmer comparison, machine learning, HMMs, annotations | (Akhter et al., 2012)    |
| VirSorter (2015)    | 1.0.6   | conda           | mcl, muscle, blast+, bioperl, hmmer, diamond, metagene_annotator                                     | 13 GB                                   | Alignments, HMMs                                                                              | (Roux et al., 2015)      |
| Phigaro (2020)      | 2.3.0   | conda, pip      | Python3, beautifulsoup4, biopython, bs4, hmmer, lxml, numpy, pandas, plotly, prodigal, pyyaml, shsix | 1.6 GB                                  | HMMs                                                                                          | (Starikova et al., 2020) |
| DBSCAN-SWA (2020)   | 2e61b95 |                 | Numpy, Biopython, sklearn, Prokka                                                                    | 2.2 GB                                  | Gene metrics, alignments                                                                      | (Gan et al., 2020)       |
| VIBRANT (2020)      | 1.2.1   | conda           | Python3, Prodigal, HMMER3, BioPython, Pandas, Matplotlib, Seaborn, Numpy, Scikit-learn, Pickle       | 11 GB                                   | HMMs (KEGG, Pfam, VOG), machine learning                                                      | (Kieft et al., 2020)     |
| PhageBoost (2021)   | 0.1.7   | pip             | Python3                                                                                              | 13 MB                                   | Gene and nucleotide metrics, machine learning                                                 | (Sirén et al., 2021)     |
| VirSorter2 (2021)   | 2.2.1   | conda           | Python3, snakemake, scikit-learn, imbalanced-learn, pandas, seaborn, hmmer, prodigal, screed         | 12 GB                                   | Alignments, HMMs                                                                              | (Guo et al., 2021)       |

130

### 131 **Ease of installation**

132 The prophage prediction packages Phigaro, PhiSpy, VIBRANT, VirSorter, and VirSorter2 are all able to  
 133 be installed with conda from the Bioconda channel (Grüning et al., 2018), while Phispy, Phigaro, and  
 134 PhageBoost can be installed with pip—the Python package installer. Phigaro, VIBRANT, VirSorter,  
 135 and VirSorter2 require a manual one-time setup to download their respective databases. Phigaro  
 136 uses hard-coded file paths for its database installation, either to the user’s home directory or to a  
 137 system directory requiring root permissions. Neither option is ideal as it is impossible to have

138 isolated versions or installations of the program, and it prevents updating the installation paths of its  
139 dependencies. For PhageBoost to be able to take existing annotations, a custom script was created  
140 to skip the gene prediction stage and run the program. Basic PhiSpy functionality is provided without  
141 requiring third-party databases. However, if the HMM search option is invoked, a database of phage-  
142 like proteins— e.g. pVOG (Grazziotin et al., 2017), VOGdb (<https://vogdb.org>), or PHROGS (Terzian P  
143 et al., 2021)—must be manually downloaded before it can be included in PhiSpy predictions.  
144 DBSCAN-SWA is not currently available on any package manager and must be pulled from GitHub,  
145 however all its dependencies are available via conda and it could easily be added in the future. All  
146 the above “manual” installation and setup steps are uncomplicated and are automatically executed  
147 by the Snakemake pipelines provided in the framework.

148 Phage Finder was last updated in 2006 and is not available on any package manager that we are  
149 aware of. The installation process is dated with the package scripts liberally utilising hard-coded file  
150 paths. The Snakemake pipeline for this package resolves this with soft links between the  
151 framework’s directory to the user’s home directory (where the package expects to be installed). The  
152 dependencies are available via conda allowing the complete installation and setup to be handled  
153 automatically by Snakemake.

154 LysoPhD does not appear to be available to download anywhere and was dropped from the  
155 comparison. ProphET requires the unsupported BLAST legacy and EMBOSS packages. It is not  
156 available on any package manager and instructions for a clean installation are incomplete and not  
157 compatible with conda. The codebase was last updated in 2019. Numerous issues were encountered  
158 installing dependencies and despite significant effort we were not able to create a working  
159 installation. ProphET’s installation script reported many errors during setup, but alarmingly finished  
160 with an exit code zero to indicate a *successful* installation. Preparing the necessary GFF files in a  
161 format that the program could use was non-trivial. The program reported errors during runtime that  
162 we believe are related to the errors encountered during installation; ProphET terminated with  
163 incomplete output but again returned an exit code zero to indicate a *successful* run. ProphET was  
164 dropped from the comparison.

## 165 Prophage prediction performance

166 There was minimal difference in the performance metrics for the different methods of running  
167 PhiSpy, and we have recently shown (Roach et al in preparation) that including HMM searches with  
168 PhiSpy results in less than one additional prophage being identified. Therefore, only PhiSpy using  
169 default settings will be discussed in comparison to the other tools. PhiSpy, VIBRANT, and Phigaro  
170 performed best for mean accuracy (Figure 1a; Table S3) while DBSCAN-SWA performed the worst.  
171 PhiSpy, Phigaro, and Phage Finder performed best for mean precision (Figure 1b; Table S3). DBSCAN-  
172 SWA, PhageBoost, VirSorter, and VirSorter2 all performed poorly for mean precision. This was  
173 mostly driven by a high false-positive rate compared to the other tools (Figure S1). PhiSpy, VirSorter,  
174 VirSorter2, VIBRANT, DBSCAN-SWA and PhageBoost all had high mean recall scores.

175 Each tool balances between recall and precision. For example, the more conservative Phage Finder  
176 performed relatively well in terms of precision, making very confident predictions, but had one of  
177 the lower mean recall ratios and was not predicting prophages based on limited information. In  
178 contrast, the more speculative DBSCAN-SWA and PhageBoost both exhibited the opposite trend.

179 The  $f_1$  Score is a more nuanced metric, as it requires high performance in both precision and recall.  
180 PhiSpy, VIBRANT, Phigaro, VirSorter, and VirSorter2 all averaged above 0.5, while the remaining  
181 tools suffered from too many false predictions (FP or FN) (Figure 1d).

182

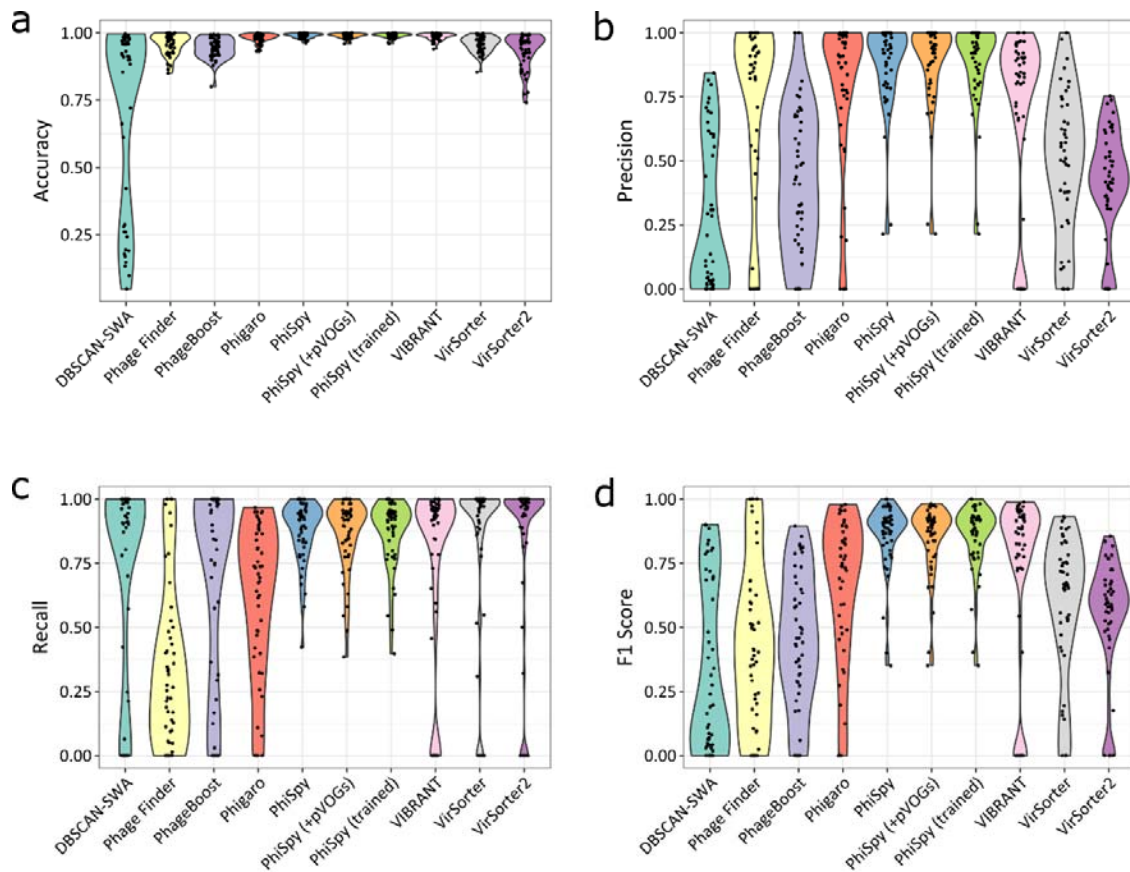

183

184 *Figure 1: Prediction performance metrics for prophage callers. Violin plots for each tool are*  
185 *shown with individual points for each genome indicated. The graphs show: ‘Accuracy’ (a) as*  
186 *the ratio of correctly labelled genes to all genes, ‘Precision’ (b) as the ratio of correctly*  
187 *labelled phage genes to all predicted phage genes, ‘Recall’ (c) as the ratio of correctly*  
188 *labelled phage genes to all known phage genes, and ‘f1 Score’ (d) as defined in the*  
189 *methods. For all graphs, more is generally better.*

190

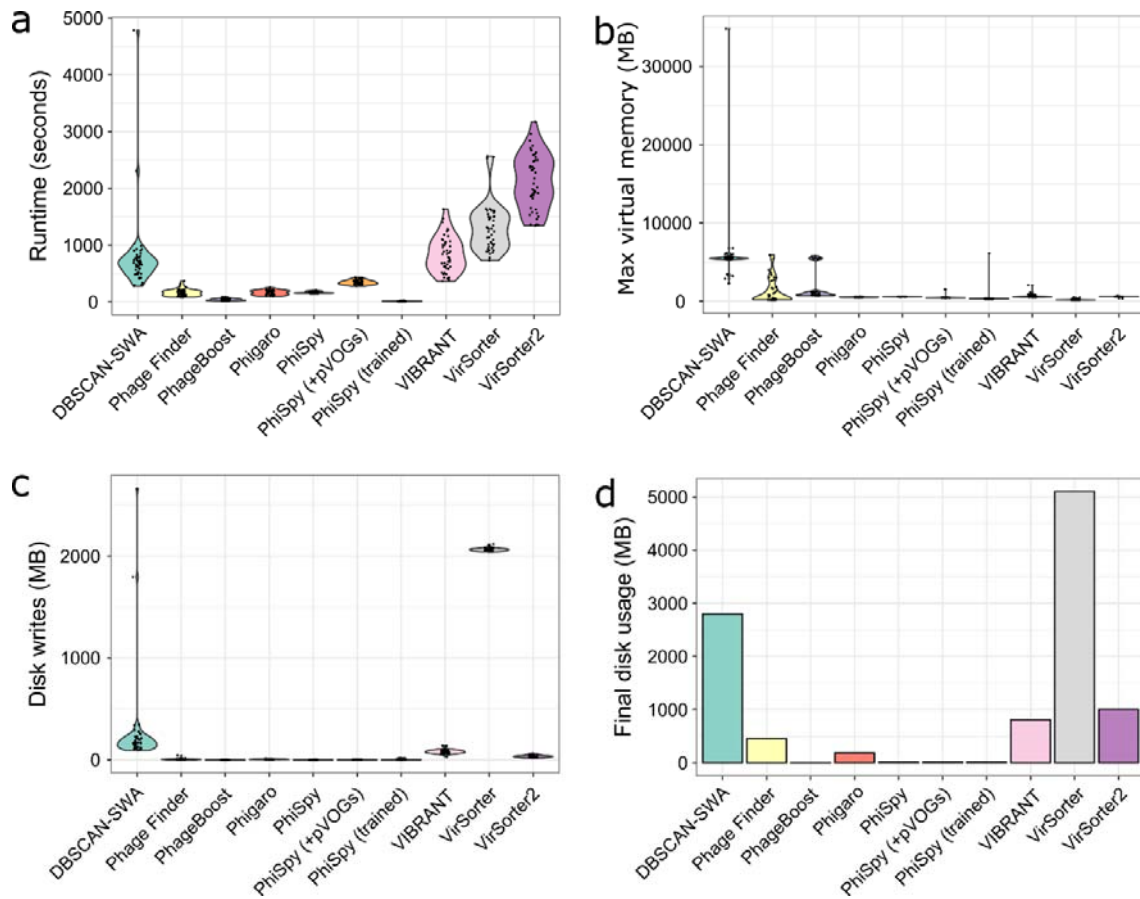

191

192 *Figure 2: Runtime and peak memory usage comparison. Violin plots for each tool are shown*  
193 *with individual points for each genome indicated. The graphs show total runtime in seconds*  
194 *(a), peak memory usage in MB (b), total file writes in MB (c) and the final total disk usage (all*  
195 *genomes) in MB (d). For all graphs, less is better.*

## 196 Runtime performance

197 Many users will not be too concerned about runtime performance, for instance if they are  
198 performing a one-off analysis on a genome of interest all the tools will finish in a reasonable time.  
199 However, efficient resource utilization is an important consideration for large-scale analyses.  
200 Provisioning computing resources costs money and a well optimised tool that runs fast translates to  
201 real-world savings. The runtime distributions across the genomes are shown for each tool in Figure  
202 2a. The slowest prophage predictors were generally VirSorter and VirSorter2 with mean runtimes of  
203 1,316 and 2,118 seconds respectively, except for a single DBSCAN-SWA run taking 4,697 seconds.  
204 PhiSpy using the trained datasets was by far the fastest performing tool (8.4 seconds mean runtime),  
205 although if an appropriate training set is not available for the genus of interest it would first need to  
206 be generated to benefit from these reduced runtimes. PhageBoost was the next fastest (37.8  
207 seconds mean runtime) and Phage Finder, Phigaro, and PhiSpy with default parameters all  
208 performed similarly well in terms of runtime.

209 Memory requirements also remain an important consideration for provisioning resources for large-  
210 scale analyses. For instance, inefficiency is encountered where the memory required by single-  
211 threaded processes exceeds the available memory per CPU. Peak memory usage for each tool is  
212 shown in Figure 2b. Memory requirements were lowest for VirSorter and trained PhiSpy with 210  
213 and 450 MB mean peak memory respectively. There was a single notable exception for trained



214 PhiSpy (predicting prophages in *E. coli* O157:57 EDL933) with a peak memory usage of 6.13 GB.  
215 DBSCAN-SWA had the highest mean peak memory of 6.0 GB with one run requiring 35 GB at its  
216 peak. Apart from the DBSCAN-SWA outlier, there were no situations where the peak memory usage  
217 would prevent the analysis from completing on a modest personal computer, but at larger-scales,  
218 Phigaro, PhiSpy, VirSorter, and VirSorter2 have an advantage in terms of peak memory usage.

219 Another important consideration for large-scale analyses are the file sizes that are generated by the  
220 different tools. Large output file sizes can place considerable strain on storage capacities, and large  
221 numbers of read and write operations can severely impact the performance of a system or HPC  
222 cluster for all users. Total file writes for the default files (in MB, including temporary files) are shown  
223 in Figure 2c and the final disk usage for all genomes for each tool is shown in Figure 2d. VirSorter,  
224 DBSCAN-SWA, and VirSorter2 performed the most write operations with mean file writes of 2.063,  
225 0.262, and 0.034 GB respectively. The other tools performed similarly well and have a clear  
226 advantage at scale as they perform far fewer disk writes. VirSorter and DBSCAN-SWA removed most  
227 of their generated files, however, the final disk usage for these tools were still the highest at 5.36  
228 and 2.96 GB respectively. Disk usage for PhageBoost and PhiSpy was by far the lowest at 0.14 and 15  
229 MB respectively.

## 230 Caveats

231 Every bioinformatics comparison involves many biases. In this comparison, PhiSpy performs well, but  
232 we developed PhiSpy and many of the gold-standard genomes were extensively used during its  
233 development to optimize the algorithm. VirSorter and VirSorter2 were primarily developed to  
234 identify viral regions in metagenomes rather than prophages in bacterial genomes—although they  
235 have been used for that e.g. in Glickman et al. (2020)—and filtering VirSorter and VirSorter2 hits  
236 with CheckV (Nayfach et al., 2021) is recommended. By openly providing the Prophage Prediction  
237 Comparison framework, creating a framework to install and test different software, and defining a  
238 straightforward approach to labelling prophages in GenBank files, we hope to expand our gold-  
239 standard set of genomes and mitigate many of our biases. We welcome the addition of other  
240 genomes (especially from beyond the Proteobacteria/Bacteroidetes/Firmicutes that are  
241 overrepresented in our gold-standard database).

242 Recent developments in alternative approaches to predict prophages, including mining phage-like  
243 genes from metagenomes and then mapping them to complete genomes (Nayfach et al., 2021) and  
244 using short-read mapping to predict prophage regions from complete bacterial genomes (Kieft and  
245 Anantharaman, 2021) have the potential to generate many more ground-truth prophage  
246 observations. However, both approaches are limited as they will identify prophages that are active,  
247 but are unable to identify quiescent prophage regions, and thus for prophage prediction algorithms  
248 they will provide useful true positive datasets but may not provide accurate true negative datasets.

## 249 Conclusions

250 In this comparison, PhiSpy, VIBRANT, and Phigaro were the best performing prophage prediction  
251 tools for  $f_1$  score. PhiSpy and Phigaro were also among the best in terms of runtime performance  
252 metrics. Phage Finder performs well in terms of precision at the expense of false-negatives, whereas  
253 VirSorter, VirSorter2, DBSCAN-SWA and PhageBoost perform well for recall at the expense of false-  
254 positives. Currently, DBSCAN-SWA, VirSorter, and VirSorter2 are not as well suited for large-scale  
255 identification of prophages from complete bacterial genomes when compared to the other tools.  
256 More genomes with manually curated prophage annotations are needed, and we anticipate that  
257 these benchmarks will change with the addition of new genomes, the addition of new tools, and as

258 the tools are updated over time. Developers are strongly encouraged to contribute by adding or  
259 updating their tool and adding their manually curated genomes to be included in the benchmarking.  
260 Users are strongly encouraged to check the GitHub repository for the latest results before making  
261 any decisions on which prophage prediction tool would best suit their needs.

## 262 Author contributions

263 RAE conceived of the study; KM and PD generated the initial gold-standard set and SKG, LI, and EP  
264 contributed to the gold-standard set; RAE and MJR created the framework; RAE, MJR, and SR  
265 performed the analysis. All authors contributed to the manuscript writing.

## 266 Acknowledgments

267 This work supported by the National Institute Of Diabetes And Digestive And Kidney Diseases of the  
268 National Institutes of Health under Award Number RC2DK116713 to RAE. The support provided by  
269 Flinders University for HPC research resources is acknowledged.

## 270 Data availability

271 All the data is available at DOI: 10.5281/zenodo.4739878 and from  
272 <https://github.com/linsalrob/ProphagePredictionComparisons/tree/v0.1-beta>

## 273 Figure captions

274 **Figure 1: Prediction performance metrics for prophage callers.** Violin plots for each tool are shown  
275 with individual points for each genome indicated. The graphs show: ‘Accuracy’ (*a*) as the ratio of  
276 correctly labelled genes to all genes, ‘Precision’ (*b*) as the ratio of correctly labelled phage genes to  
277 all predicted phage genes, ‘Recall’ (*c*) as the ratio of correctly labelled phage genes to all known  
278 phage genes, and ‘*f*<sub>1</sub> Score’ (*d*) as defined in the methods. For all graphs, more is generally better.

279 **Figure 2: Runtime and peak memory usage comparison.** Violin plots for each tool are shown with  
280 individual points for each genome indicated. The graphs show total runtime in seconds (*a*), peak  
281 memory usage in MB (*b*), total file writes in MB (*c*) and the final total disk usage (all genomes) in MB  
282 (*d*). For all graphs, less is better.

## 283 Supplementary data

284 **Table S1. Genomes provided in the gold-standard library with manually curated prophages**

285 **Table S2. Prophages identified in the genomes**

286 **Table S3. Mean metrics for each tool as measured from our gold-standard set of genomes**

287 **Figure S1. False positive comparison.** Violin plots for each tool show ‘False Positives’ as the number  
288 of genes incorrectly labelled prophage genes in each genome. Less is better.

## 289 References

- 290 AKHTER, S., AZIZ, R. K. & EDWARDS, R. A. 2012. PhiSpy: a novel algorithm for finding prophages in  
291 bacterial genomes that combines similarity- and composition-based strategies. *Nucleic acids*  
292 *research*, 40, e126-e126.
- 293 AMGARTEN, D., BRAGA, L. P. P., DA SILVA, A. M. & SETUBAL, J. C. 2018. MARVEL, a Tool for  
294 Prediction of Bacteriophage Sequences in Metagenomic Bins. *Frontiers in Genetics*, 9.
- 295 ARNDT, D., GRANT, J. R., MARCU, A., SAJED, T., PON, A., LIANG, Y. & WISHART, D. S. 2016. PHASTER:  
296 a better, faster version of the PHAST phage search tool. *Nucleic Acids Res*, 44, W16-21.

- 297 AZIZ, R. K., BARTELS, D., BEST, A. A., DEJONGH, M., DISZ, T., EDWARDS, R. A., FORMSMA, K., GERDES,  
298 S., GLASS, E. M., KUBAL, M., MEYER, F., OLSEN, G. J., OLSON, R., OSTERMAN, A. L.,  
299 OVERBEEK, R. A., MCNEIL, L. K., PAARMANN, D., PACZIAN, T., PARRELLO, B., PUSCH, G. D.,  
300 REICH, C., STEVENS, R., VASSIEVA, O., VONSTEIN, V., WILKE, A. & ZAGNITKO, O. 2008. The  
301 RAST Server: Rapid Annotations using Subsystems Technology. *BMC Genomics*, 9, 75.
- 302 BREITBART, M. 2012. Marine Viruses: Truth or Dare. *Annual Review of Marine Science*, 4, 425-448.
- 303 BRÜSSOW, H., CANCHAYA, C. & HARDT, W.-D. 2004. Phages and the Evolution of Bacterial  
304 Pathogens: from Genomic Rearrangements to Lysogenic Conversion. *Microbiology and  
305 Molecular Biology Reviews*, 68, 560-602.
- 306 CALENDAR, R. 1988. *The Bacteriophages*, Plenum Press, New York, Springer US.
- 307 CAMPBELL, A. M. 2002. Preferential Orientation Preferential Orientation of Natural Lambdoid  
308 Prophages and Bacterial Chromosome Organization. *Theoretical Population Biology*, 61, 503-  
309 507.
- 310 CANCHAYA, C., PROUX, C., FOURNOUS, G., BRUTTIN, A. & BRÜSSOW, H. 2003. Prophage Genomics.  
311 *Microbiology and Molecular Biology Reviews*, 67, 238-276.
- 312 CASJENS, S. 2003. Prophages and bacterial genomics: what have we learned so far? *Mol Microbiol*,  
313 49, 277-300.
- 314 DUTILH, B. E., CASSMAN, N., MCNAIR, K., SANCHEZ, S. E., SILVA, G. G. Z., BOLING, L., BARR, J. J.,  
315 SPETH, D. R., SEGURITAN, V., AZIZ, R. K., FELTS, B., DINSDALE, E. A., MOKILI, J. L. &  
316 EDWARDS, R. A. 2014. A highly abundant bacteriophage discovered in the unknown  
317 sequences of human faecal metagenomes. *Nature Communications*, 5, 4498.
- 318 FOUTS, D. E. 2006. Phage\_Finder: Automated identification and classification of prophage regions in  
319 complete bacterial genome sequences. *Nucleic Acids Research*, 34, 5839-5851.
- 320 GAN, R., ZHOU, F., SI, Y., YANG, H., CHEN, C., WU, J., ZHANG, F. & HUANG, Z. 2020. DBSCAN-SWA: an  
321 integrated tool for rapid prophage detection and annotation. *bioRxiv*, 2020.07.12.199018.
- 322 GLICKMAN, C., KAMMLADE, S. M., HASAN, N. A., EPPERSON, L. E., DAVIDSON, R. M. & STRONG, M.  
323 2020. Characterization of integrated prophages within diverse species of clinical  
324 nontuberculous mycobacteria. *Virology Journal*, 17, 124.
- 325 GRAZZIOTIN, A. L., KOONIN, E. V. & KRISTENSEN, D. M. 2017. Prokaryotic Virus Orthologous Groups  
326 (pVOGs): a resource for comparative genomics and protein family annotation. *Nucleic acids  
327 research*, 45, D491-D498.
- 328 GRIGORIEV, A. 1998. Analyzing genomes with cumulative skew diagrams. *Nucleic Acids Research*, 26,  
329 2286-2290.
- 330 GRÜNING, B., DALE, R., SJÖDIN, A., CHAPMAN, B. A., ROWE, J., TOMKINS-TINCH, C. H., VALIERIS, R.,  
331 KÖSTER, J. & THE BIOCONDA, T. 2018. Bioconda: sustainable and comprehensive software  
332 distribution for the life sciences. *Nature Methods*, 15, 475-476.
- 333 GUO, J., BOLDUC, B., ZAYED, A. A., VARSANI, A., DOMINGUEZ-HUERTA, G., DELMONT, T. O.,  
334 PRATAMA, A. A., GAZITÚA, M. C., VIK, D., SULLIVAN, M. B. & ROUX, S. 2021. VirSorter2: a  
335 multi-classifier, expert-guided approach to detect diverse DNA and RNA viruses.  
336 *Microbiome*, 9, 37.
- 337 HYATT, D., CHEN, G.-L., LOCASCIO, P. F., LAND, M. L., LARIMER, F. W. & HAUSER, L. J. 2010. Prodigal:  
338 prokaryotic gene recognition and translation initiation site identification. *BMC  
339 bioinformatics*, 11, 119-119.
- 340 KANG, H. S., MCNAIR, K., CUEVAS, D. A., BAILEY, B. A., SEGALL, A. M. & EDWARDS, R. A. 2017.  
341 Prophage genomics reveals patterns in phage genome organization and replication. *bioRxiv*,  
342 114819.
- 343 KIEFT, K. & ANANTHARAMAN, K. 2021. Deciphering active prophages from metagenomes. *bioRxiv*,  
344 2021.01.29.428894.
- 345 KIEFT, K., ZHOU, Z. & ANANTHARAMAN, K. 2020. VIBRANT: automated recovery, annotation and  
346 curation of microbial viruses, and evaluation of viral community function from genomic  
347 sequences. *Microbiome*, 8, 90.

- 348 KÖSTER, J. & RAHMANN, S. 2012. Snakemake—a scalable bioinformatics workflow engine.  
349 *Bioinformatics*, 28, 2520-2522.
- 350 LIMA-MENDEZ, G., VAN HELDEN, J., TOUSSAINT, A. & LEPLAE, R. 2008. Prophinder: a computational  
351 tool for prophage prediction in prokaryotic genomes. *Bioinformatics*, 24, 863-865.
- 352 MCNAIR, K., ZHOU, C., DINSDALE, E. A., SOUZA, B. & EDWARDS, R. A. 2019. PHANOTATE: a novel  
353 approach to gene identification in phage genomes. *Bioinformatics*, 35, 4537-4542.
- 354 NAYFACH, S., CAMARGO, A. P., SCHULZ, F., ELOE-FADROSH, E., ROUX, S. & KYRPIDES, N. C. 2021.  
355 CheckV assesses the quality and completeness of metagenome-assembled viral genomes.  
356 *Nature Biotechnology*, 39, 578-585.
- 357 NIU, Q., PENG, S., ZHANG, X., LI, S., XU, Y., XIE, X. & TONG, Y. LysoPhD: predicting functional  
358 prophages in bacterial genomes from high-throughput sequencing. 2019 IEEE International  
359 Conference on Bioinformatics and Biomedicine (BIBM), 18-21 Nov. 2019 2019. 1-5.
- 360 NOGUCHI, H., TANIGUCHI, T. & ITOH, T. 2008. MetaGeneAnnotator: detecting species-specific  
361 patterns of ribosomal binding site for precise gene prediction in anonymous prokaryotic and  
362 phage genomes. *DNA research : an international journal for rapid publication of reports on*  
363 *genes and genomes*, 15, 387-396.
- 364 REIS-CUNHA, J. L., BARTHOLOMEU, D. C., MANSON, A. L., EARL, A. M. & CERQUEIRA, G. C. 2019.  
365 ProphET, prophage estimation tool: A stand-alone prophage sequence prediction tool with  
366 self-updating reference database. *PLOS ONE*, 14, e0223364.
- 367 ROUX, S., ENAULT, F., HURWITZ, B. L. & SULLIVAN, M. B. 2015. VirSorter: mining viral signal from  
368 microbial genomic data. *PeerJ*, 3, e985.
- 369 SEEMANN, T. 2014. Prokka: rapid prokaryotic genome annotation. *Bioinformatics*, 30, 2068-2069.
- 370 SIRÉN, K., MILLARD, A., PETERSEN, B., GILBERT, M THOMAS P., CLOKIE, M. R. J. & SICHERITZ-PONTÉN,  
371 T. 2021. Rapid discovery of novel prophages using biological feature engineering and  
372 machine learning. *NAR Genomics and Bioinformatics*, 3.
- 373 SONG, W., SUN, H.-X., ZHANG, C., CHENG, L., PENG, Y., DENG, Z., WANG, D., WANG, Y., HU, M., LIU,  
374 W., YANG, H., SHEN, Y., LI, J., YOU, L. & XIAO, M. 2019. Prophage Hunter: an integrative  
375 hunting tool for active prophages. *Nucleic Acids Research*, 47, W74-W80.
- 376 SOUSA, A. L. D., MAUÉS, D., LOBATO, A., FRANCO, E. F., PINHEIRO, K., ARAÚJO, F., PANTOJA, Y.,  
377 COSTA DA SILVA, A. L. D., MORAIS, J. & RAMOS, R. T. J. 2018. PhageWeb – Web Interface for  
378 Rapid Identification and Characterization of Prophages in Bacterial Genomes. *Frontiers in*  
379 *Genetics*, 9.
- 380 STARIKOVA, E. V., TIKHONOVA, P. O., PRIANICHNIKOV, N. A., RANDS, C. M., ZDOBNOV, E. M., ILINA,  
381 E. N. & GOVORUN, V. M. 2020. Phigaro: high-throughput prophage sequence annotation.  
382 *Bioinformatics*, 36, 3882-3884.
- 383 TERZIAN P, OLO NDELA E, GALIEZ C, LOSSOUARN J, PÉREZ BUCIO RE, MOM R, TOUSSAINT A, PETIT  
384 MA & F., E. 2021. *PHROG : families of prokaryotic virus proteins clustered using remote*  
385 *homology*. [Online]. Available: <https://phrogs.lmge.uca.fr/> [Accessed June 2021].

386

387 *Table S3. Mean metrics for each tool as measured from our gold-standard set of genomes.*

| <b>Tool</b>  | <b>Accuracy</b> | <b>Precision</b> | <b>Recall</b> | <b><math>f_1</math> score</b> |
|--------------|-----------------|------------------|---------------|-------------------------------|
| DBSCAN-SWA   | 0.72            | 0.30             | 0.72          | 0.33                          |
| Phage Finder | 0.95            | 0.76             | 0.35          | 0.43                          |
| PhageBoost   | 0.94            | 0.45             | 0.70          | 0.45                          |
| Phigaro      | 0.98            | 0.82             | 0.61          | 0.65                          |
| PhiSpy       | 0.99            | 0.88             | 0.87          | 0.85                          |
| VIBRANT      | 0.99            | 0.70             | 0.75          | 0.72                          |
| VirSorter    | 0.96            | 0.49             | 0.83          | 0.58                          |
| VirSorter2   | 0.93            | 0.42             | 0.82          | 0.54                          |

388

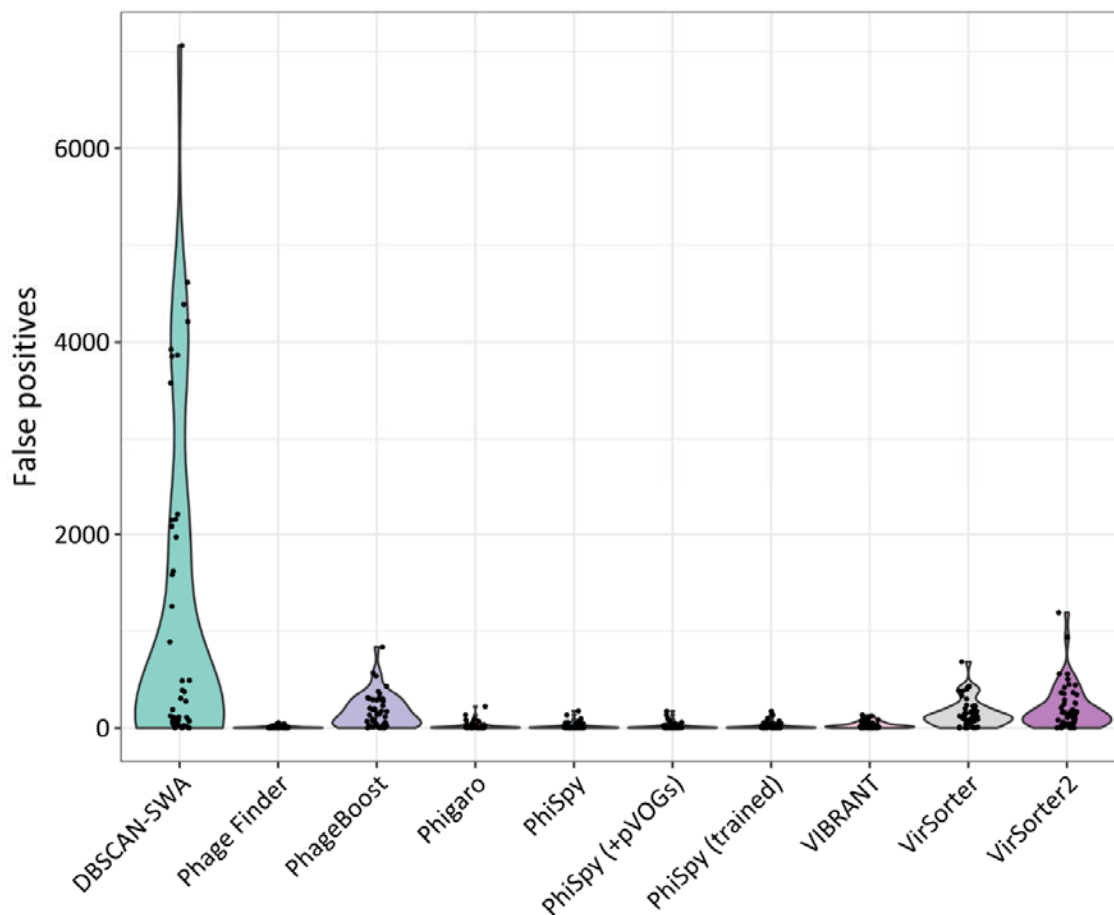

389

390 *Figure S1. False positive comparison. Violin plots for each tool show 'False Positives' as the*  
391 *number of genes incorrectly labelled prophage genes in each genome. Less is better.*

392

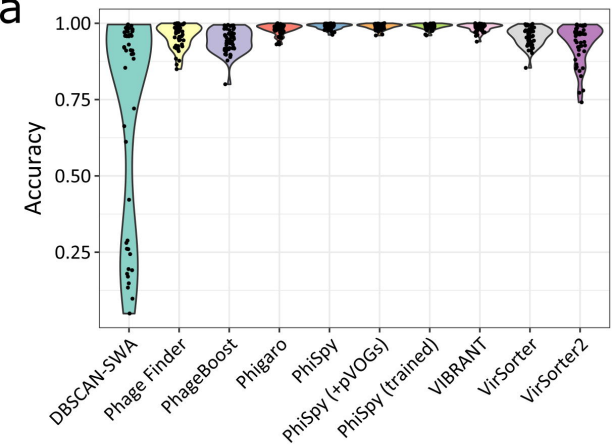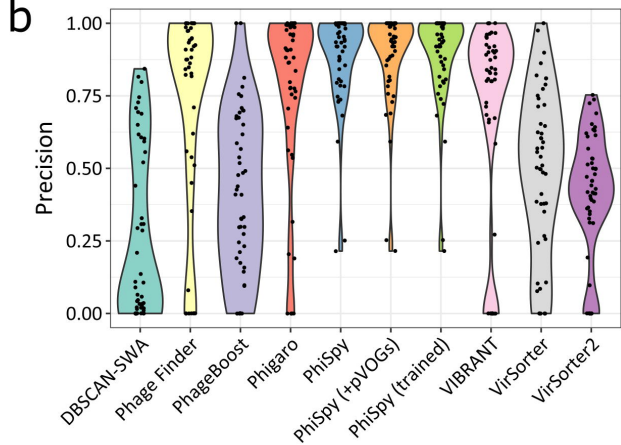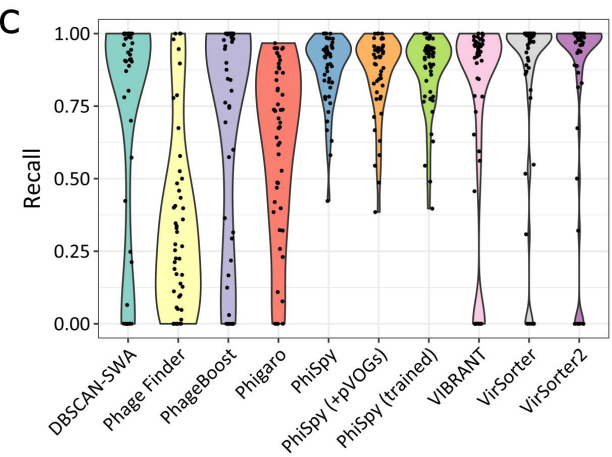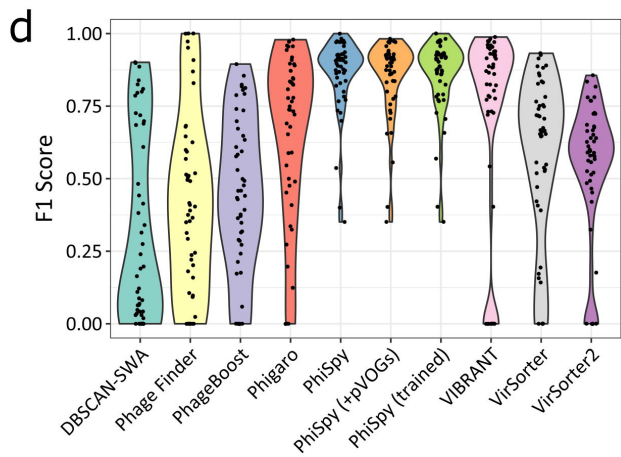

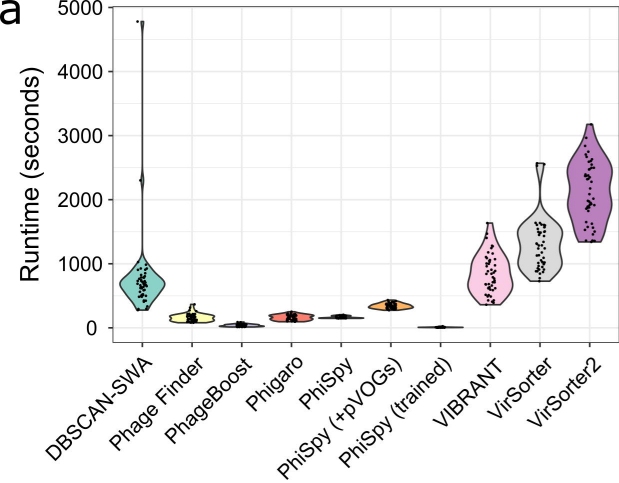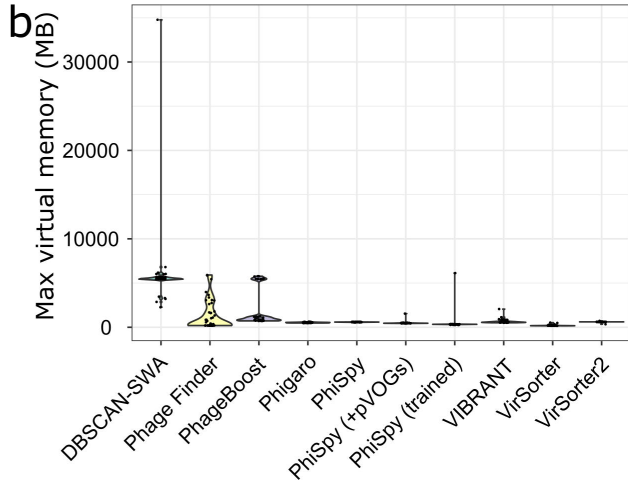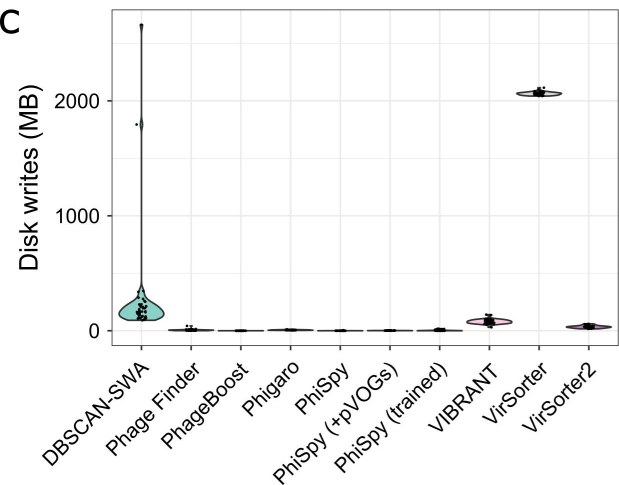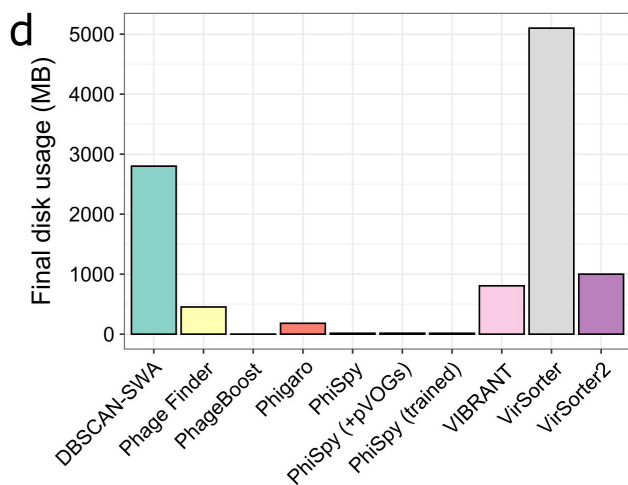

Source: https://www.biorxiv.org/content/10.1101/2021.06.03.446868v2.full.pdf
