# 1 Philympics 2021: Prophage 2 Predictions Perplex Programs

3 Michael J. Roach<sup>1\*</sup>, Katelyn McNair<sup>2</sup>, Sarah K. Giles<sup>1</sup>, Laura Inglis<sup>1</sup>, Evan Pargin<sup>1</sup>, Przemysław  
4 Decewicz<sup>3</sup>, Robert A. Edwards<sup>1</sup>

5 1. Flinders Accelerator for Microbiome Exploration, Flinders University, 5042, SA, Australia

6 2. Computational Sciences Research Center, San Diego State University, San Diego, 92182, CA, USA

7 3. Department of Environmental Microbiology and Biotechnology, Institute of Microbiology, Faculty  
8 of Biology, University of Warsaw, Warsaw, 02-096, Poland

9

10 \*Corresponding Author: [michael.roach@flinders.edu.au](mailto:michael.roach@flinders.edu.au)

11

## 12 Abstract

13 Most bacterial genomes contain integrated bacteriophages—prophages—in various states of decay.  
14 Many are active and able to excise from the genome and replicate, while others are cryptic  
15 prophages, remnants of their former selves. Over the last two decades, many computational tools  
16 have been developed to identify the prophage components of bacterial genomes, and it is a  
17 particularly active area for the application of machine learning approaches. However, progress is  
18 hindered and comparisons thwarted because there are no manually curated bacterial genomes that  
19 can be used to test new prophage prediction algorithms.

20 Here, we present a library of gold-standard bacterial genome annotations that include manually  
21 curated prophage annotations, and a computational framework to compare the predictions from  
22 different algorithms. We use this suite to compare all extant stand-alone prophage prediction  
23 algorithms to identify their strengths and weaknesses.

24 We provide a FAIR dataset for prophage identification, and demonstrate the accuracy, precision,  
25 recall, and  $f_1$  score from the analysis of seven different algorithms for the prediction of prophages.  
26 We discuss caveats and concerns in this analysis and how those concerns may be mitigated.

27

## 28 Introduction

29 Bacteriophages (phages), viruses that infect bacteria, can be either temperate or virulent.  
30 Temperate phages may integrate into their bacterial host genome and the host-integrated phage  
31 genome is referred to as a prophage. Prophages are ubiquitous and may constitute as much as 20  
32 percent of bacterial genomes (Casjens, 2003). Prophages replicate as part of the host bacterial  
33 genomes until external conditions trigger a transition into the virulent lytic cycle, resulting in  
34 replication and packaging of phages and typically the death of the host bacteria. Prophages generally  
35 contain a set of core genes with a conserved gene order that facilitate integration into the host  
36 genome, assembly of phage structural components, replication, and lysis of the host cell (Kang et al.,  
37 2017, Canchaya et al., 2003). As well as these core genes, phages can contain an array of accessory  
38 metabolic genes that can effect significant phenotypic changes in the host bacteria (Breitbart, 2012).  
39 For instance, many prophages encode virulence factors such as toxins, or they can encode fitness  
40 factors such as nutrient uptake systems (Brüssow et al., 2004). Lastly, most prophages encode a  
41 variety of super-infection exclusion mechanism to prevent concurrent phage infections, including  
42 restriction/modification systems, toxin/antitoxin genes, repressors, etc. (Calendar, 1988). The  
43 function of most prophage accessory genes remains unknown.

44 Core (pro)phage genes have long been used for identifying prophage regions. However, there are  
45 other unique characteristics that can distinguish prophages from their host genomes: bacterial  
46 genomes have a GC skew that correlates with direction of replication, and the insertion of prophages  
47 will generally disrupt this GC bias (Grigoriev, 1998). Transcript direction (Campbell, 2002) and length  
48 of prophage proteins have also proven to be useful metrics in predicting prophages (Akhter et al.,  
49 2012, Song et al., 2019), where phage genes are generally smaller and are oriented in the same  
50 direction (Dutilh et al., 2014). Likewise, gene density tends to be higher in phage genomes and  
51 intergenic space shorter (Amgarten et al., 2018, McNair et al., 2019).

52 Over the last two decades many prophage prediction tools have been developed, and they fall into  
53 two broad classes: (1) web-based tools where users upload a bacterial genome and retrieve  
54 annotations including PHASTER (Arndt et al., 2016), Prophage Hunter (Song et al., 2019), Prophinder  
55 (Lima-Mendez et al., 2008), PhageWeb (Sousa et al., 2018), and RAST (Aziz et al., 2008); and (2)  
56 command-line tools where users download a program and database to run the predictions locally  
57 (although some of these also provide a web interface for remote execution). In this work we focus  
58 on this latter set of tools (Table 1) because web-based tools typically do not handle the large  
59 numbers of simultaneous requests required to run comparisons across many genomes.

60 Despite the abundance of prophage prediction algorithms, there has never been either a set of  
61 reference genomes against which all tools can be compared, nor a unified framework for comparing  
62 those tools to identify their relative strengths and weaknesses or to identify opportunities for  
63 improvement. We generated a set of manually annotated bacterial genomes released under the  
64 FAIR principles (Findable, Accessible, Interoperable, and Reusable), and developed an openly  
65 available and accessible framework to compare prophage prediction tools.

## 66 Methods

### 67 Running the tools

68 To assess the accuracy of the different prophage prediction tools, a set of 49 gold-standard publicly  
69 available bacterial genomes with manually curated prophage annotations was generated. The  
70 genomes and prophage annotations currently included are available in Tables S1 and S2. The  
71 genomes are in GenBank format and file conversion scripts are included in the framework to convert  
72 those files to formats used by the different software. The tools that are currently included in the  
73 framework are outlined in Table 1. Snakemake (Köster and Rahmann, 2012) pipelines utilising conda  
74 (Anaconda Software Distribution. *Conda*. v4.10.1, April 2021) package manager environments were  
75 created for each tool to handle the installation of the tool and its dependencies, running of the  
76 analyses, output file conversion to a standardized format, and benchmarking of the run stage.  
77 Where possible, annotations from the GenBank files were used in the analysis to promote  
78 consistency between comparisons. Additional pipelines were created for running PhiSpy using the  
79 included training sets for the appropriate genera, and for running PhiSpy with pVOG (Grazziotin et  
80 al., 2017) HMMs and these are also available in the repository. DBSCAN-SWA was not able to  
81 consistently finish when using GenBank files as input, and instead the genome files in fasta format  
82 were used. Another pipeline was created to pool the results from each tool and some comparisons  
83 are illustrated in the included Jupyter notebook. Testing and development of the pipelines were  
84 conducted on Flinders University's DeepThought HPC infrastructure. The final benchmarking analysis  
85 was performed on a stand-alone node consisting of dual Intel® Xeon® Gold 6242R processors  
86 (40 cores, 80 threads), 768 GB of RAM, and 58 TB of disk space. Each tool was executed on all  
87 genomes in parallel (one thread per job), with no other jobs running.

## 88 Benchmark metrics

89 There are many potential ways to compare prophage predictions: For instance, is it more important

### *Box 1. Benchmark Metrics Used in this Analysis*

Accuracy was calculated as the ratio of correctly labelled genes to all CDS features from the GenBank file.

$$\frac{TP + TN}{TP + TN + FP + FN}$$

Precision was calculated as the ratio of correctly labelled phage genes to all predicted prophage genes

$$\frac{TP}{TP + FP}$$

Recall was calculated as the ratio of correctly labelled prophage genes to all known prophage genes

$$\frac{TP}{TP + FN}$$

The f1 Score was calculated as the harmonic mean of Precision and Recall

$$2 \times \frac{(Recall \times Precision)}{(Recall + Precision)}$$

*Accuracy* provides an overall impression of correctness but is distorted by the vast difference in the numbers of prophage and non-prophage genes present in the genomes. The current gold-standard set includes 7,729 prophage proteins and 177,649 non-prophage proteins. Therefore, predicting everything as not coming from a prophage will result in an accuracy of 0.96. Similarly, identifying everything as coming from a prophage will result in high *Recall*, since that favours minimising false negatives. In contrast, *Precision* favours minimising false-positives and so only predicting very confident regions will result in high precision. The f1 Score is the most suitable for comparing predictions as it gives equal weighting to both precision and recall, and thus balances the unevenness inherent in this data.

90 to capture all prophage regions or minimise false positives? Is it more important to identify all the  
91 phage-encoded genes, or the exact locations of the attachment site core duplications (*attL* and  
92 *attR*)? The runtime and CPU time in seconds, peak memory usage and file write operations were

93 captured by Snakemake for the steps running the prophage tools only (not for any file conversion  
94 steps before or after running each tool). The predictions were then compared to the gold standard  
95 annotations and the number of true positive (TP), true negative (TN), false positive (FP) and false  
96 negative (FN) gene labels were used to calculate the performance metrics. Each application marks  
97 prophages slightly differently, and therefore we used the designation of coding sequence (CDS)  
98 features as phage or not to assess prophage predictions.

## 99 Adding new genomes

100 We developed the framework to simplify the addition of new genomes to the benchmarks. Each  
101 genome is provided in the standard GenBank format, and the prophages are marked by the inclusion  
102 of a non-standard flag for each genomic feature that indicates that it is part of a prophage. We use  
103 the flag `/is_phage="1"` to indicate prophage regions.

## 104 Results and Discussion

### 105 Software Compared

106 We compared the availability, installation, and results from ten different prophage prediction  
107 algorithms (Table 1). Two—ProphET (Reis-Cunha et al., 2019) and LysoPhD (Niu et al., 2019)—could  
108 not be successfully installed and were not included in the current framework (see below). The  
109 remaining eight PhiSpy (Akhter et al., 2012), Phage Finder (Fouts, 2006), VIBRANT (Kieft et al., 2020),  
110 VirSorter (Roux et al., 2015), Virsorter2 (Guo et al., 2021), Phigaro (Starikova et al., 2020),  
111 PhageBoost (Sirén et al., 2021), and DBSCAN-SWA (Gan et al., 2020) were each used to predict the  
112 prophages in 49 different manually curated microbial genomes.

113 Most of these programs utilize protein sequence similarity and HMM searches of core prophage  
114 genes to identify prophage regions. PhageBoost leverages a large range of protein features (such as  
115 dipeptide and tripeptide combinations) with a trained prediction model. PhiSpy was originally  
116 designed to identify prophage regions based upon seven distinct characteristics: protein length,  
117 transcript directionality, AT and GC skew, unique phage words, phage insertion points, optionally  
118 phage protein similarity and sequence similarity. DBSCAN-SWA likewise uses a range of gene metrics  
119 and trained prediction models to identify prophages.

120 Regardless of whether annotations are available, Virsorter2, Phigaro, and PhageBoost all perform *de*  
121 *novo* gene prediction with Prodigal (Hyatt et al., 2010) and VirSorter uses MetaGeneAnnotator  
122 (Noguchi et al., 2008) for the same purpose. VIBRANT can take proteins if they have ‘Prodigal format  
123 definition lines’ but otherwise performs predictions with Prodigal. PhageBoost can take existing  
124 annotations but this requires additional coding by the user. DBSCAN-SWA can take annotations or  
125 can perform gene predictions with Prokka (Seemann, 2014). PhiSpy takes an annotated genome in  
126 GenBank format and uses the annotations provided.

127

128 *Table 1: Prophage identification tools currently included in benchmarking framework*

| Tool (year)         | Version | Package manager | Dependencies                                                                                         | Database size                           | Approach                                                   | Citation                 |
|---------------------|---------|-----------------|------------------------------------------------------------------------------------------------------|-----------------------------------------|------------------------------------------------------------|--------------------------|
| Phage Finder (2006) | 2.1     |                 | Aragorn, blast-legacy, hmmer, infernal, mummer, trnscan-se                                           | 93 MB                                   | Legacy-BLAST, HMMs                                         | (Fouts, 2006)            |
| PhiSpy (2012)       | 4.2.6   | conda, pip      | Python3, biopython, numpy, scipy                                                                     | 47 MB required, 733 MB optional (pVOGs) | Annotations, gene and nucleotide metrics, AT/CG skew, HMMs | (Akhter et al., 2012)    |
| VirSorter (2015)    | 1.0.6   | conda           | mcl, muscle, blast+, bioperl, hmmer, diamond, metagene_annotator                                     | 13 GB                                   | Alignments, HMMs                                           | (Roux et al., 2015)      |
| Phigaro (2020)      | 2.3.0   | conda, pip      | Python3, beautifulsoup4, biopython, bs4, hmmer, lxml, numpy, pandas, plotly, prodigal, pyyaml, shsix | 1.6 GB                                  | HMMs                                                       | (Starikova et al., 2020) |
| DBSCAN-SWA (2020)   | 2e61b95 |                 | Numpy, Biopython, sklearn, Prokka                                                                    | 2.2 GB                                  | Gene metrics                                               | (Gan et al., 2020)       |
| VIBRANT (2020)      | 1.2.1   | conda           | Python3, Prodigal, HMMER3, BioPython, Pandas, Matplotlib, Seaborn, Numpy, Scikit-learn, Pickle       | 11 GB                                   | HMMs (KEGG, Pfam, VOG), machine learning                   | (Kieft et al., 2020)     |
| PhageBoost (2021)   | 0.1.7   | pip             | Python3                                                                                              | 13 MB                                   | Gene and nucleotide metrics, machine learning              | (Sirén et al., 2021)     |
| VirSorter2 (2021)   | 2.2.1   | conda           | Python3, snakemake, scikit-learn, imbalanced-learn, pandas, seaborn, hmmer, prodigal, screed         | 12 GB                                   | Alignments, HMMs                                           | (Guo et al., 2021)       |

129

### 130 **Ease of installation**

131 The prophage prediction packages Phigaro, PhiSpy, VIBRANT, VirSorter, and VirSorter2 are all able to  
 132 be installed with conda from the Bioconda channel (Grüning et al., 2018), while Phispy, Phigaro, and  
 133 PhageBoost can be installed with pip—the Python package installer. Phigaro, VIBRANT, VirSorter,  
 134 and VirSorter2 require a manual one-time setup to download their respective databases. Phigaro  
 135 uses hard-coded file paths for its database installation, either to the user’s home directory or to a  
 136 system directory requiring root permissions. Neither option is ideal as it is impossible to have  
 137 isolated versions or installations of the program, and it prevents updating the installation paths of its  
 138 dependencies. For PhageBoost to be able to take existing annotations, a custom script was created  
 139 to skip the gene prediction stage and run the program. Basic PhiSpy functionality is provided without

140 requiring third-party databases. However, if the HMM search option is invoked, a database of phage-  
141 like proteins— e.g. pVOG (Grazziotin et al., 2017), VOGdb (<https://vogdb.org>), or PHROGS (Terzian P  
142 et al., 2021)—must be manually downloaded before it can be included in PhiSpy predictions.  
143 DBSCAN-SWA is not currently available on any package manager and must be pulled from GitHub,  
144 however all its dependencies are available via conda and it could easily be added in the future. All  
145 the above “manual” installation and setup steps are uncomplicated and are automatically executed  
146 by the Snakemake pipelines provided in the framework.

147 Phage Finder was last updated in 2006 and is not available on any package manager that we are  
148 aware of. The installation process is dated with the package scripts liberally utilising hard-coded file  
149 paths. The Snakemake pipeline for this package resolves this with soft links between the  
150 framework’s directory to the user’s home directory (where the package expects to be installed). The  
151 dependencies are available via conda allowing the complete installation and setup to be handled  
152 automatically by Snakemake.

153 LysoPhD does not appear to be available to download anywhere and was dropped from the  
154 comparison. ProphET requires the unsupported BLAST legacy and EMBOSS packages. It is not  
155 available on any package manager and instructions for a clean installation are incomplete and not  
156 compatible with conda. The codebase was last updated in 2019. Numerous issues were encountered  
157 installing dependencies and despite significant effort we were not able to create a working  
158 installation. ProphET’s installation script reported many errors during setup, but alarmingly finished  
159 with an exit code zero to indicate a *successful* installation. Preparing the necessary GFF files in a  
160 format that the program could use was non-trivial. The program reported errors during runtime that  
161 we believe are related to the errors encountered during installation; ProphET terminated with  
162 incomplete output but again returned an exit code zero to indicate a *successful* run. ProphET was  
163 dropped from the comparison.

## 164 Prophage prediction performance

165 There was minimal difference in the performance metrics for the different methods of running  
166 PhiSpy, and we have recently shown (Roach et al in preparation) that including HMM searches with  
167 PhiSpy results in less than one additional prophage being identified. Therefore, only PhiSpy using  
168 default settings will be discussed in comparison to the other tools. PhiSpy, VIBRANT, and Phigaro  
169 performed best for mean accuracy (Figure 1a; Table S3) while DBSCAN-SWA performed the worst.  
170 PhiSpy, Phigaro, and Phage Finder performed best for mean precision (Figure 1b; Table S3). DBSCAN-  
171 SWA, PhageBoost, VirSorter, and VirSorter2 all performed poorly for mean precision. This was  
172 mostly driven by a high false-positive rate for DBSCAN-SWA and PhageBoost compared to the other  
173 tools (Figure S1), whereas for VirSorter and VirSorter2 the low precision was driven by low true-  
174 positive rates, which are reflected in poor recall scores (Figure 1c). PhiSpy, VIBRANT, DBSCAN-SWA  
175 and PhageBoost had the highest mean recall.

176 Each tool balances between recall and precision. For example, the more conservative Phage Finder  
177 performed relatively well in terms of precision, making very confident predictions, but had one of  
178 the lower mean recall ratios and was not predicting prophages based on limited information. In  
179 contrast, the more speculative DBSCAN-SWA and PhageBoost both exhibited the opposite trend.

180 The  $f_1$  Score is a more nuanced metric, as it requires high performance in both precision and recall.  
181 PhiSpy, VIBRANT, and Phigaro all averaged above 0.5, while the remaining tools suffered from too  
182 many false predictions (FP or FN) (Figure 1d).

183

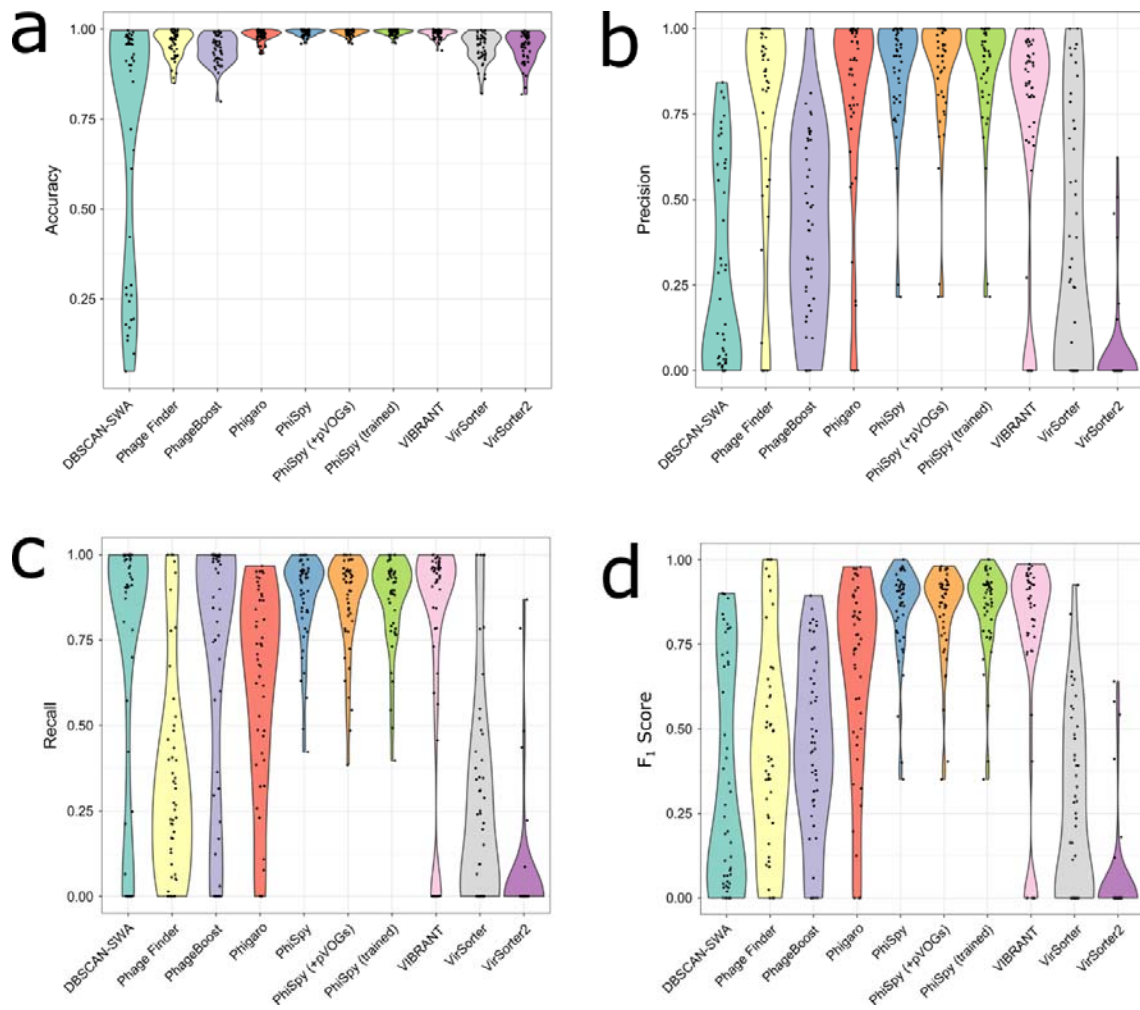

184

185 *Figure 1: Prediction performance metrics for prophage callers. Violin plots for each tool are*  
186 *shown with individual points for each genome indicated. The graphs show: 'Accuracy' (a) as*  
187 *the ratio of correctly labelled genes to all genes, 'Precision' (b) as the ratio of correctly*  
188 *labelled phage genes to all predicted phage genes, 'Recall' (c) as the ratio of correctly*  
189 *labelled phage genes to all known phage genes, and 'f1 Score' (d) as defined in the*  
190 *methods. For all graphs, more is generally better.*

191

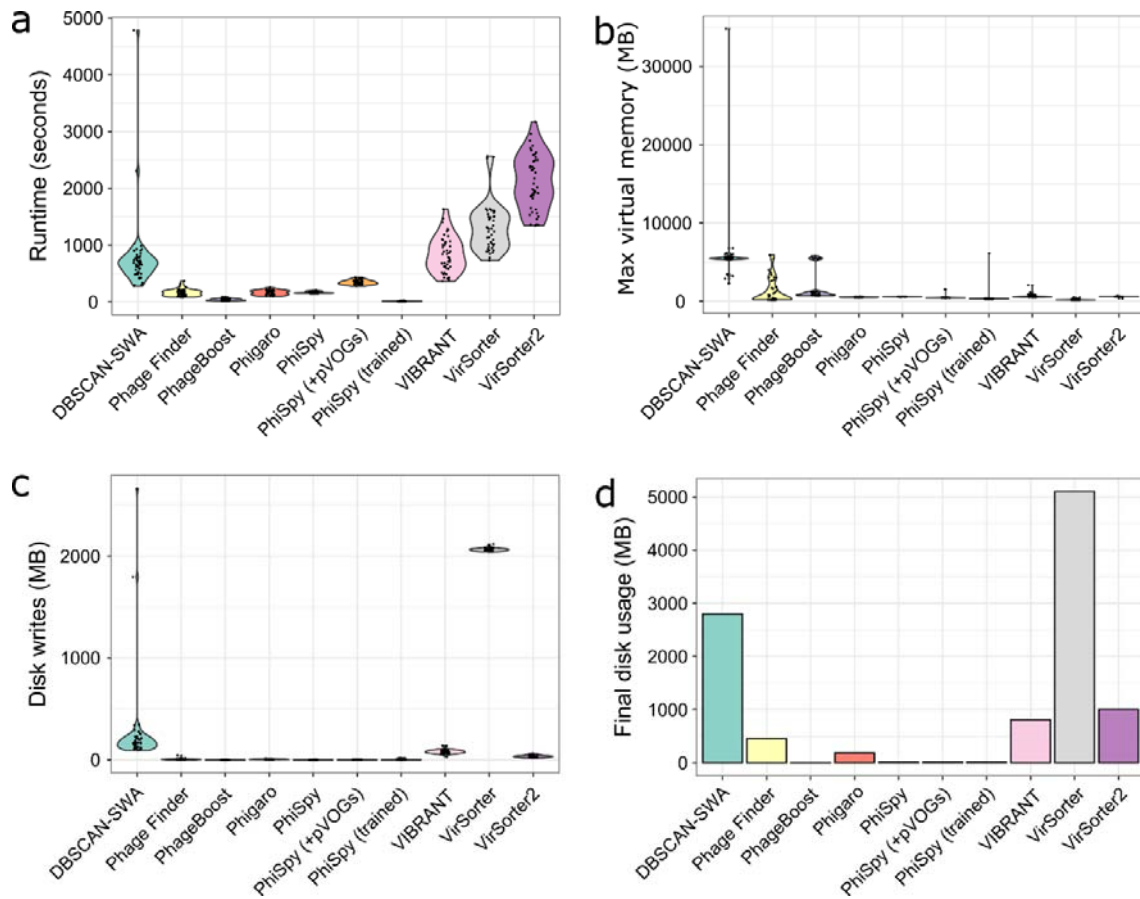

192

193 *Figure 2: Runtime and peak memory usage comparison. Violin plots for each tool are shown*  
 194 *with individual points for each genome indicated. The graphs show total runtime in seconds*  
 195 *(a), peak memory usage in MB (b), total file writes in MB (c) and the final total disk usage (all*  
 196 *genomes) in MB (d). For all graphs, less is better.*

## 197 Runtime performance

198 Many users will not be too concerned about runtime performance, for instance if they are  
 199 performing a one-off analysis on a genome of interest all the tools will finish in a reasonable time.  
 200 However, efficient resource utilization is an important consideration for large-scale analyses.  
 201 Provisioning computing resources costs money and a well optimised tool that runs fast translates to  
 202 real-world savings. The runtime distributions across the genomes are shown for each tool in Figure  
 203 2a. The slowest prophage predictors were generally VirSorter and VirSorter2 with mean runtimes of  
 204 1,316 and 2,118 seconds respectively, except for a single DBSCAN-SWA run taking 4,697 seconds.  
 205 PhiSpy using the trained datasets was by far the fastest performing tool (8.4 seconds mean runtime),  
 206 although if an appropriate training set is not available for the genus of interest it would first need to  
 207 be generated to benefit from these reduced runtimes. PhageBoost was the next fastest (37.8  
 208 seconds mean runtime) and Phage Finder, Phigaro, and PhiSpy with default parameters all  
 209 performed similarly well in terms of runtime.

210 Memory requirements also remain an important consideration for provisioning resources for large-  
 211 scale analyses. For instance, inefficiency is encountered where the memory required by single-  
 212 threaded processes exceeds the available memory per CPU. Peak memory usage for each tool is  
 213 shown in Figure 2b. Memory requirements were lowest for VirSorter and trained PhiSpy with 210  
 214 and 450 MB mean peak memory respectively. There was a single notable exception for trained



215 PhiSpy (predicting prophages in *E. coli* O157:57 EDL933) with a peak memory usage of 6.13 GB.  
216 DBSCAN-SWA had the highest mean peak memory of 6.0 GB with one run requiring 35 GB at its  
217 peak. Apart from the DBSCAN-SWA outlier, there were no situations where the peak memory usage  
218 would prevent the analysis from completing on a modest personal computer, but at larger-scales,  
219 Phigaro, PhiSpy, VirSorter, and VirSorter2 have an advantage in terms of peak memory usage.

220 Another important consideration for large-scale analyses are the file sizes that are generated by the  
221 different tools. Large output file sizes can place considerable strain on storage capacities, and large  
222 numbers of read and write operations can severely impact the performance of a system or HPC  
223 cluster for all users. Total file writes for the default files (in MB, including temporary files) are shown  
224 in Figure 2c and the final disk usage for all genomes for each tool is shown in Figure 2d. VirSorter,  
225 DBSCAN-SWA, and VirSorter2 performed the most write operations with mean file writes of 2.063,  
226 0.262, and 0.034 GB respectively. The other tools performed similarly well and have a clear  
227 advantage at scale as they perform far fewer disk writes. VirSorter and DBSCAN-SWA removed most  
228 of their generated files, however, the final disk usage for these tools were still the highest at 5.36  
229 and 2.96 GB respectively. Disk usage for PhageBoost and PhiSpy was by far the lowest at 0.14 and 15  
230 MB respectively.

## 231 Caveats

232 Every bioinformatics comparison involves many biases. In this comparison, PhiSpy performs well, but  
233 we developed PhiSpy and many of the gold-standard genomes were extensively used during its  
234 development to optimize the algorithm. VirSorter and VirSorter2 were primarily developed to  
235 identify viral regions in metagenomes rather than prophages in bacterial genomes—although they  
236 have been used for that e.g. in Glickman et al. (2020). By openly providing the Prophage Prediction  
237 Comparison framework, creating a framework to install and test different software, and defining a  
238 straightforward approach to labelling prophages in GenBank files, we hope to expand our gold-  
239 standard set of genomes and mitigate many of our biases. We welcome the addition of other  
240 genomes (especially from beyond the Proteobacteria/Bacteroidetes/Firmicutes that are  
241 overrepresented in our gold-standard database).

242 Recent developments in alternative approaches to predict prophages, including mining phage-like  
243 genes from metagenomes and then mapping them to complete genomes (Nayfach et al., 2021) and  
244 using short-read mapping to predict prophage regions from complete bacterial genomes (Kieft and  
245 Anantharaman, 2021) have the potential to generate many more ground-truth prophage  
246 observations. However, both approaches are limited as they will identify prophages that are active,  
247 but are unable to identify quiescent prophage regions, and thus for prophage prediction algorithms  
248 they will provide useful true positive datasets but may not provide accurate true negative datasets.

## 249 Conclusions

250 In this comparison, PhiSpy, VIBRANT, and Phigaro were the best performing prophage prediction  
251 tools for  $f_1$  score. PhiSpy and Phigaro were also among the best in terms of runtime performance  
252 metrics. Phage Finder performs well in terms of precision at the expense of false-negatives, whereas  
253 both DBSCAN-SWA and PhageBoost perform well for recall at the expense of false-positives.  
254 Currently, DBSCAN-SWA, VirSorter, and VirSorter2 are not nearly as well suited for large-scale  
255 identification of prophages from complete bacterial genomes when compared to the other tools.  
256 More genomes with manually curated prophage annotations are needed, and we anticipate that  
257 these benchmarks will change with the addition of new genomes, the addition of new tools, and as  
258 the tools are updated over time. Developers are strongly encouraged to contribute by adding or

259 updating their tool and adding their manually curated genomes to be included in the benchmarking.  
260 Users are strongly encouraged to check the GitHub repository for the latest results before making  
261 any decisions on which prophage prediction tool would best suit their needs.

## 262 Author contributions

263 RAE conceived of the study; KM and PD generated the initial gold-standard set and SKG, LI, and EP  
264 contributed to the gold-standard set; RAE and MJR created the framework and performed the  
265 analysis. All authors contributed to the manuscript writing.

## 266 Acknowledgments

267 This work supported by the National Institute Of Diabetes And Digestive And Kidney Diseases of the  
268 National Institutes of Health under Award Number RC2DK116713 to RAE. The support provided by  
269 Flinders University for HPC research resources is acknowledged.

## 270 Data availability

271 All the data is available at DOI: 10.5281/zenodo.4739878 and from  
272 <https://github.com/liinsalrob/ProphagePredictionComparisons/tree/v0.1-beta>

## 273 Figure captions

274 **Figure 1: Prediction performance metrics for prophage callers.** Violin plots for each tool are shown  
275 with individual points for each genome indicated. The graphs show: 'Accuracy' (*a*) as the ratio of  
276 correctly labelled genes to all genes, 'Precision' (*b*) as the ratio of correctly labelled phage genes to  
277 all predicted phage genes, 'Recall' (*c*) as the ratio of correctly labelled phage genes to all known  
278 phage genes, and 'f<sub>1</sub> Score' (*d*) as defined in the methods. For all graphs, more is generally better.

279 **Figure 2: Runtime and peak memory usage comparison.** Violin plots for each tool are shown with  
280 individual points for each genome indicated. The graphs show total runtime in seconds (*a*), peak  
281 memory usage in MB (*b*), total file writes in MB (*c*) and the final total disk usage (all genomes) in MB  
282 (*d*). For all graphs, less is better.

## 283 Supplementary data

284 Table S1. Genomes provided in the gold-standard library with manually curated prophages

285 Table S2. Prophages identified in the genomes

286 Table S3. Mean metrics for each tool as measured from our gold-standard set of genomes.

287 Figure S1. False positive comparison. Violin plots for each tool show 'False Positives' as the number  
288 of genes incorrectly labelled prophage genes in each genome. Less is better.

## 289 References

- 290 AKHTER, S., AZIZ, R. K. & EDWARDS, R. A. 2012. PhiSpy: a novel algorithm for finding prophages in  
291 bacterial genomes that combines similarity- and composition-based strategies. *Nucleic acids*  
292 *research*, 40, e126-e126.
- 293 AMGARTEN, D., BRAGA, L. P. P., DA SILVA, A. M. & SETUBAL, J. C. 2018. MARVEL, a Tool for  
294 Prediction of Bacteriophage Sequences in Metagenomic Bins. *Frontiers in Genetics*, 9.
- 295 ARNDT, D., GRANT, J. R., MARCU, A., SAJED, T., PON, A., LIANG, Y. & WISHART, D. S. 2016. PHASTER:  
296 a better, faster version of the PHAST phage search tool. *Nucleic Acids Res*, 44, W16-21.

- 297 AZIZ, R. K., BARTELS, D., BEST, A. A., DEJONGH, M., DISZ, T., EDWARDS, R. A., FORMSMA, K., GERDES,  
298 S., GLASS, E. M., KUBAL, M., MEYER, F., OLSEN, G. J., OLSON, R., OSTERMAN, A. L.,  
299 OVERBEEK, R. A., MCNEIL, L. K., PAARMANN, D., PACZIAN, T., PARRELLO, B., PUSCH, G. D.,  
300 REICH, C., STEVENS, R., VASSIEVA, O., VONSTEIN, V., WILKE, A. & ZAGNITKO, O. 2008. The  
301 RAST Server: Rapid Annotations using Subsystems Technology. *BMC Genomics*, 9, 75.
- 302 BREITBART, M. 2012. Marine Viruses: Truth or Dare. *Annual Review of Marine Science*, 4, 425-448.
- 303 BRÜSSOW, H., CANCHAYA, C. & HARDT, W.-D. 2004. Phages and the Evolution of Bacterial  
304 Pathogens: from Genomic Rearrangements to Lysogenic Conversion. *Microbiology and  
305 Molecular Biology Reviews*, 68, 560-602.
- 306 CALENDAR, R. 1988. *The Bacteriophages*, Plenum Press, New York, Springer US.
- 307 CAMPBELL, A. M. 2002. Preferential Orientation Preferential Orientation of Natural Lambdoid  
308 Prophages and Bacterial Chromosome Organization. *Theoretical Population Biology*, 61, 503-  
309 507.
- 310 CANCHAYA, C., PROUX, C., FOURNOUS, G., BRUTTIN, A. & BRÜSSOW, H. 2003. Prophage Genomics.  
311 *Microbiology and Molecular Biology Reviews*, 67, 238-276.
- 312 CASJENS, S. 2003. Prophages and bacterial genomics: what have we learned so far? *Mol Microbiol*,  
313 49, 277-300.
- 314 DUTILH, B. E., CASSMAN, N., MCNAIR, K., SANCHEZ, S. E., SILVA, G. G. Z., BOLING, L., BARR, J. J.,  
315 SPETH, D. R., SEGURITAN, V., AZIZ, R. K., FELTS, B., DINSDALE, E. A., MOKILI, J. L. &  
316 EDWARDS, R. A. 2014. A highly abundant bacteriophage discovered in the unknown  
317 sequences of human faecal metagenomes. *Nature Communications*, 5, 4498.
- 318 FOUTS, D. E. 2006. Phage\_Finder: Automated identification and classification of prophage regions in  
319 complete bacterial genome sequences. *Nucleic Acids Research*, 34, 5839-5851.
- 320 GAN, R., ZHOU, F., SI, Y., YANG, H., CHEN, C., WU, J., ZHANG, F. & HUANG, Z. 2020. DBSCAN-SWA: an  
321 integrated tool for rapid prophage detection and annotation. *bioRxiv*, 2020.07.12.199018.
- 322 GLICKMAN, C., KAMMLADE, S. M., HASAN, N. A., EPPERSON, L. E., DAVIDSON, R. M. & STRONG, M.  
323 2020. Characterization of integrated prophages within diverse species of clinical  
324 nontuberculous mycobacteria. *Virology Journal*, 17, 124.
- 325 GRAZZIOTIN, A. L., KOONIN, E. V. & KRISTENSEN, D. M. 2017. Prokaryotic Virus Orthologous Groups  
326 (pVOGs): a resource for comparative genomics and protein family annotation. *Nucleic acids  
327 research*, 45, D491-D498.
- 328 GRIGORIEV, A. 1998. Analyzing genomes with cumulative skew diagrams. *Nucleic Acids Research*, 26,  
329 2286-2290.
- 330 GRÜNING, B., DALE, R., SJÖDIN, A., CHAPMAN, B. A., ROWE, J., TOMKINS-TINCH, C. H., VALIERIS, R.,  
331 KÖSTER, J. & THE BIOCONDA, T. 2018. Bioconda: sustainable and comprehensive software  
332 distribution for the life sciences. *Nature Methods*, 15, 475-476.
- 333 GUO, J., BOLDUC, B., ZAYED, A. A., VARSANI, A., DOMINGUEZ-HUERTA, G., DELMONT, T. O.,  
334 PRATAMA, A. A., GAZITÚA, M. C., VIK, D., SULLIVAN, M. B. & ROUX, S. 2021. VirSorter2: a  
335 multi-classifier, expert-guided approach to detect diverse DNA and RNA viruses.  
336 *Microbiome*, 9, 37.
- 337 HYATT, D., CHEN, G.-L., LOCASCIO, P. F., LAND, M. L., LARIMER, F. W. & HAUSER, L. J. 2010. Prodigal:  
338 prokaryotic gene recognition and translation initiation site identification. *BMC  
339 bioinformatics*, 11, 119-119.
- 340 KANG, H. S., MCNAIR, K., CUEVAS, D. A., BAILEY, B. A., SEGALL, A. M. & EDWARDS, R. A. 2017.  
341 Prophage genomics reveals patterns in phage genome organization and replication. *bioRxiv*,  
342 114819.
- 343 KIEFT, K. & ANANTHARAMAN, K. 2021. Deciphering active prophages from metagenomes. *bioRxiv*,  
344 2021.01.29.428894.
- 345 KIEFT, K., ZHOU, Z. & ANANTHARAMAN, K. 2020. VIBRANT: automated recovery, annotation and  
346 curation of microbial viruses, and evaluation of viral community function from genomic  
347 sequences. *Microbiome*, 8, 90.

- 348 KÖSTER, J. & RAHMANN, S. 2012. Snakemake—a scalable bioinformatics workflow engine.  
349 *Bioinformatics*, 28, 2520-2522.
- 350 LIMA-MENDEZ, G., VAN HELDEN, J., TOUSSAINT, A. & LEPLAE, R. 2008. Prophinder: a computational  
351 tool for prophage prediction in prokaryotic genomes. *Bioinformatics*, 24, 863-865.
- 352 MCNAIR, K., ZHOU, C., DINSDALE, E. A., SOUZA, B. & EDWARDS, R. A. 2019. PHANOTATE: a novel  
353 approach to gene identification in phage genomes. *Bioinformatics*, 35, 4537-4542.
- 354 NAYFACH, S., CAMARGO, A. P., SCHULZ, F., ELOE-FADROSH, E., ROUX, S. & KYRPIDES, N. C. 2021.  
355 CheckV assesses the quality and completeness of metagenome-assembled viral genomes.  
356 *Nature Biotechnology*, 39, 578-585.
- 357 NIU, Q., PENG, S., ZHANG, X., LI, S., XU, Y., XIE, X. & TONG, Y. LysoPhD: predicting functional  
358 prophages in bacterial genomes from high-throughput sequencing. 2019 IEEE International  
359 Conference on Bioinformatics and Biomedicine (BIBM), 18-21 Nov. 2019 2019. 1-5.
- 360 NOGUCHI, H., TANIGUCHI, T. & ITOH, T. 2008. MetaGeneAnnotator: detecting species-specific  
361 patterns of ribosomal binding site for precise gene prediction in anonymous prokaryotic and  
362 phage genomes. *DNA research : an international journal for rapid publication of reports on*  
363 *genes and genomes*, 15, 387-396.
- 364 REIS-CUNHA, J. L., BARTHOLOMEU, D. C., MANSON, A. L., EARL, A. M. & CERQUEIRA, G. C. 2019.  
365 ProphET, prophage estimation tool: A stand-alone prophage sequence prediction tool with  
366 self-updating reference database. *PLOS ONE*, 14, e0223364.
- 367 ROUX, S., ENAULT, F., HURWITZ, B. L. & SULLIVAN, M. B. 2015. VirSorter: mining viral signal from  
368 microbial genomic data. *PeerJ*, 3, e985.
- 369 SEEMANN, T. 2014. Prokka: rapid prokaryotic genome annotation. *Bioinformatics*, 30, 2068-2069.
- 370 SIRÉN, K., MILLARD, A., PETERSEN, B., GILBERT, M THOMAS P., CLOKIE, M. R. J. & SICHERITZ-PONTÉN,  
371 T. 2021. Rapid discovery of novel prophages using biological feature engineering and  
372 machine learning. *NAR Genomics and Bioinformatics*, 3.
- 373 SONG, W., SUN, H.-X., ZHANG, C., CHENG, L., PENG, Y., DENG, Z., WANG, D., WANG, Y., HU, M., LIU,  
374 W., YANG, H., SHEN, Y., LI, J., YOU, L. & XIAO, M. 2019. Prophage Hunter: an integrative  
375 hunting tool for active prophages. *Nucleic Acids Research*, 47, W74-W80.
- 376 SOUSA, A. L. D., MAUÉS, D., LOBATO, A., FRANCO, E. F., PINHEIRO, K., ARAÚJO, F., PANTOJA, Y.,  
377 COSTA DA SILVA, A. L. D., MORAIS, J. & RAMOS, R. T. J. 2018. PhageWeb – Web Interface for  
378 Rapid Identification and Characterization of Prophages in Bacterial Genomes. *Frontiers in*  
379 *Genetics*, 9.
- 380 STARIKOVA, E. V., TIKHONOVA, P. O., PRIANICHNIKOV, N. A., RANDS, C. M., ZDOBNOV, E. M., ILINA,  
381 E. N. & GOVORUN, V. M. 2020. Phigaro: high-throughput prophage sequence annotation.  
382 *Bioinformatics*, 36, 3882-3884.
- 383 TERZIAN P, OLO NDELA E, GALIEZ C, LOSSOUARN J, PÉREZ BUCIO RE, MOM R, TOUSSAINT A, PETIT  
384 MA & F., E. 2021. *PHROG : families of prokaryotic virus proteins clustered using remote*  
385 *homology*. [Online]. Available: <https://phrogs.lmge.uca.fr/> [Accessed June 2021].

386

387 *Table S3. Mean metrics for each tool as measured from our gold-standard set of genomes.*

| <b>Tool</b>  | <b>Accuracy</b> | <b>Precision</b> | <b>Recall</b> | <b><math>f_1</math> score</b> |
|--------------|-----------------|------------------|---------------|-------------------------------|
| DBSCAN-SWA   | 0.72            | 0.30             | 0.72          | 0.33                          |
| Phage Finder | 0.95            | 0.76             | 0.35          | 0.43                          |
| PhageBoost   | 0.94            | 0.45             | 0.70          | 0.45                          |
| Phigaro      | 0.98            | 0.82             | 0.61          | 0.65                          |
| PhiSpy       | 0.99            | 0.88             | 0.87          | 0.85                          |
| VIBRANT      | 0.99            | 0.70             | 0.75          | 0.72                          |
| VirSorter    | 0.95            | 0.62             | 0.27          | 0.26                          |
| VirSorter2   | 0.95            | 0.28             | 0.06          | 0.05                          |

388

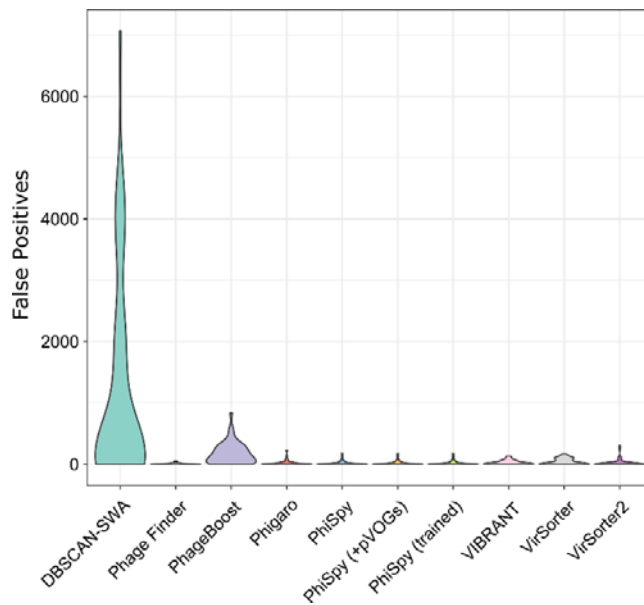

389

390 *Figure S1. False positive comparison. Violin plots for each tool show ‘False Positives’ as the*  
391 *number of genes incorrectly labelled prophage genes in each genome. Less is better.*

392

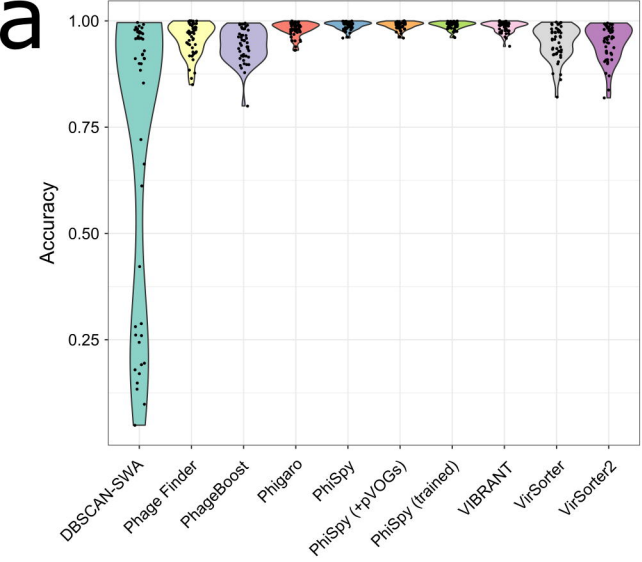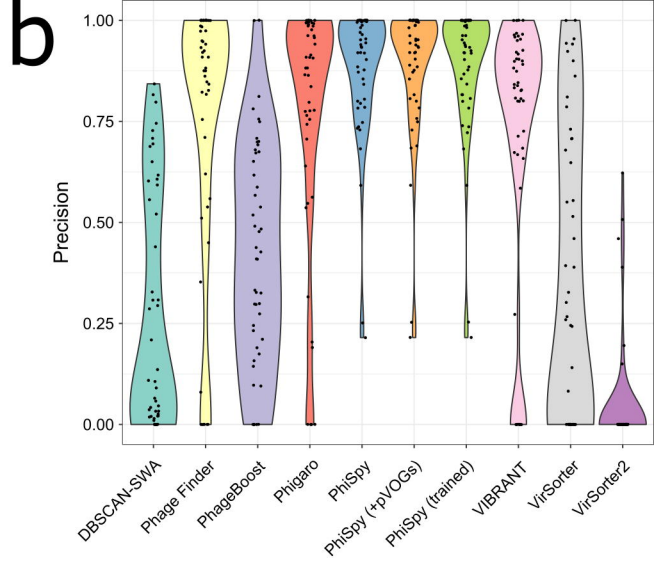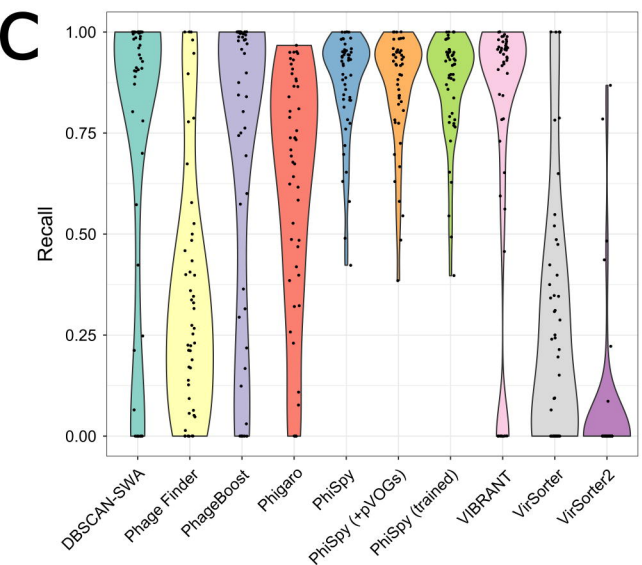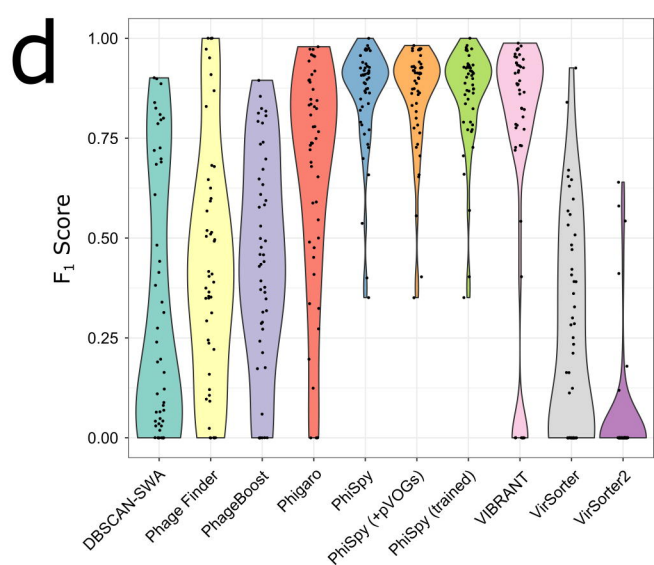

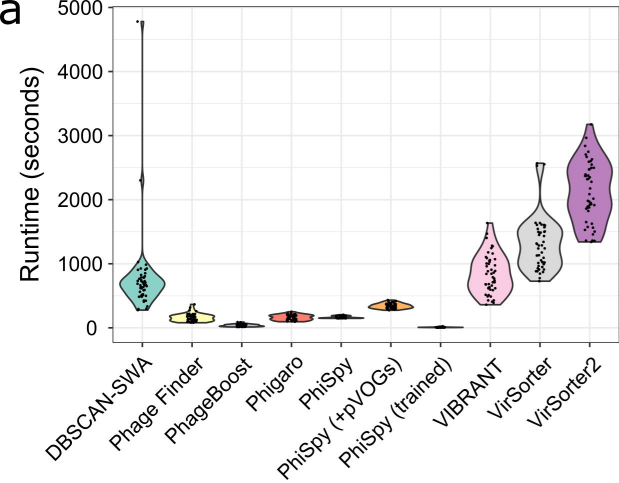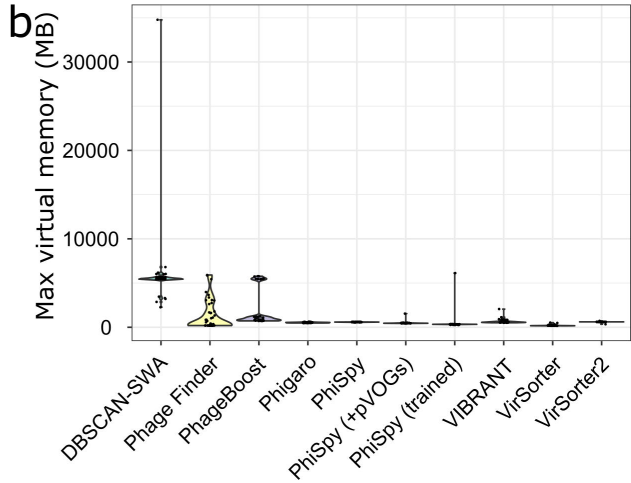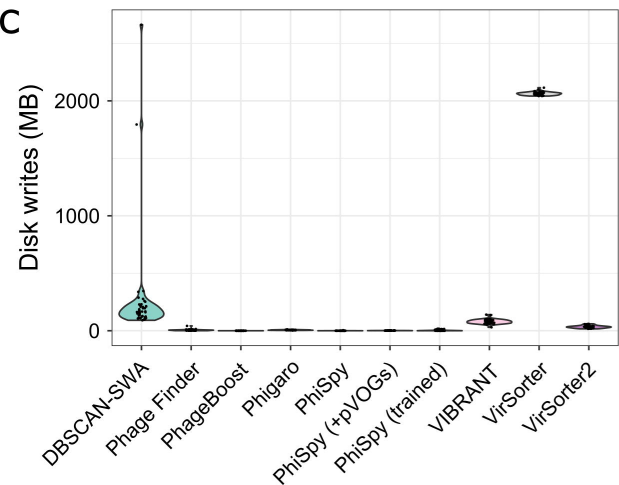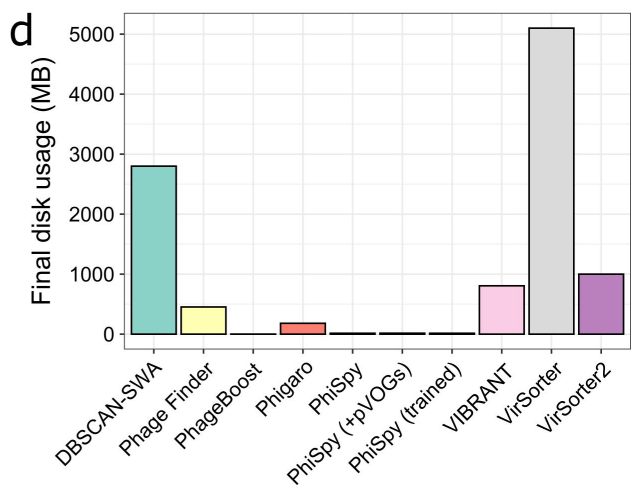

Source: https://www.biorxiv.org/content/biorxiv/early/2021/06/03/2021.06.03.446868.full.pdf
